# Supplementary material
Source: PubMed Central journal article supplement (PMC6309183)
Supplement: NIHMS1512280-supplement-1.pdf [file NIHMS1512280-supplement-1.pdf]

**Appendix Figure 1. Proposed causal diagram of the mediation analysis for the association of treatment era and subsequent neoplasm rates, mediated by doses of radiation and chemotherapy**

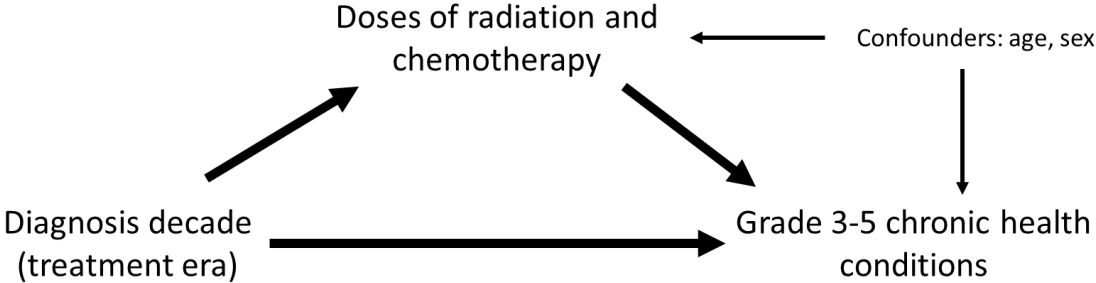

**Appendix Figure 2. Cohort composition diagram of eligible and participating childhood cancer survivors**

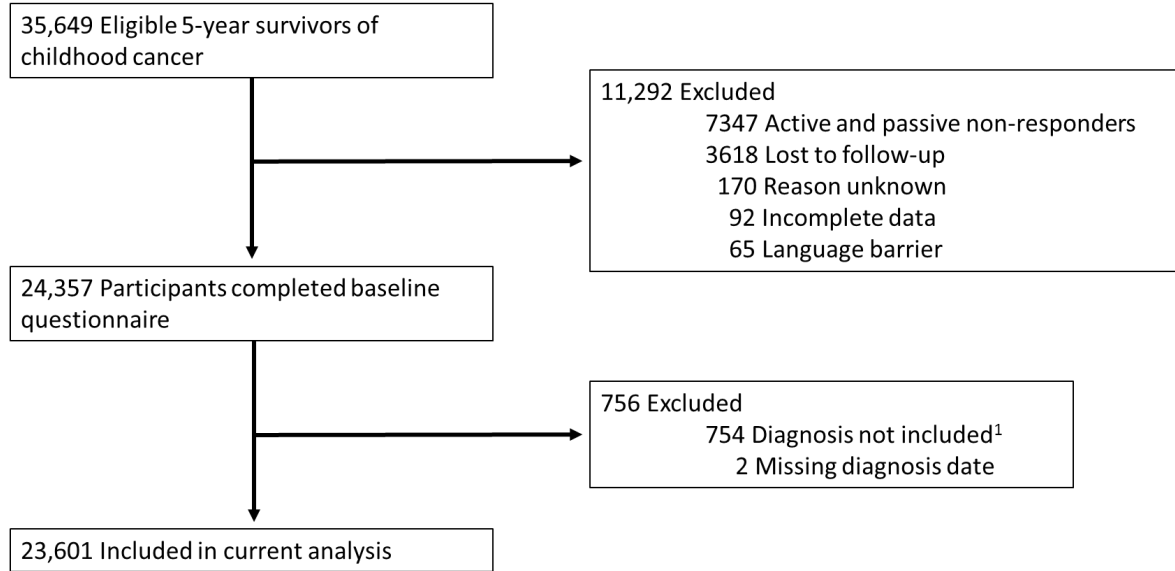

<sup>1</sup> All types of soft tissue sarcomas were included as eligible primary cancer diagnoses in survivors diagnosed from 1970-1986. When the Childhood Cancer Survivor Study was expanded to include survivors diagnosed from 1987-1999, only rhabdomyosarcoma was included among soft tissue sarcoma types as an eligible primary cancer diagnosis. Therefore, all survivors with a diagnosis of soft tissue sarcoma other than rhabdomyosarcoma were excluded from the current analysis.

**Appendix Figure 3. Cohort composition diagram of eligible and participating siblings of childhood cancer survivors**

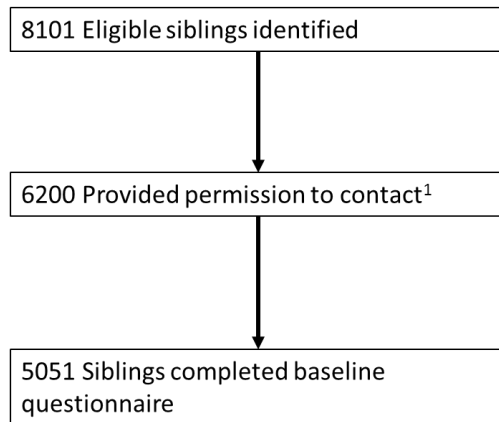

<sup>1</sup> Siblings were invited to participate for a randomly selected subgroup of participating survivors. If the participating survivor and then the sibling agreed to participate, the consent and baseline questionnaire were mailed.

**Appendix Figure 4. Diagnosis-specific cumulative incidence of two or more grade 3-5 chronic conditions by diagnosis decade.** Shaded area represents 95% confidence interval. The number of participants at risk (number censored) at each 5-year interval post-diagnosis is listed below the x-axis. The number censored does not include those who experienced a competing risk event (death from a cause other than a grade 5 chronic condition)

**Acute lymphoblastic leukemia**

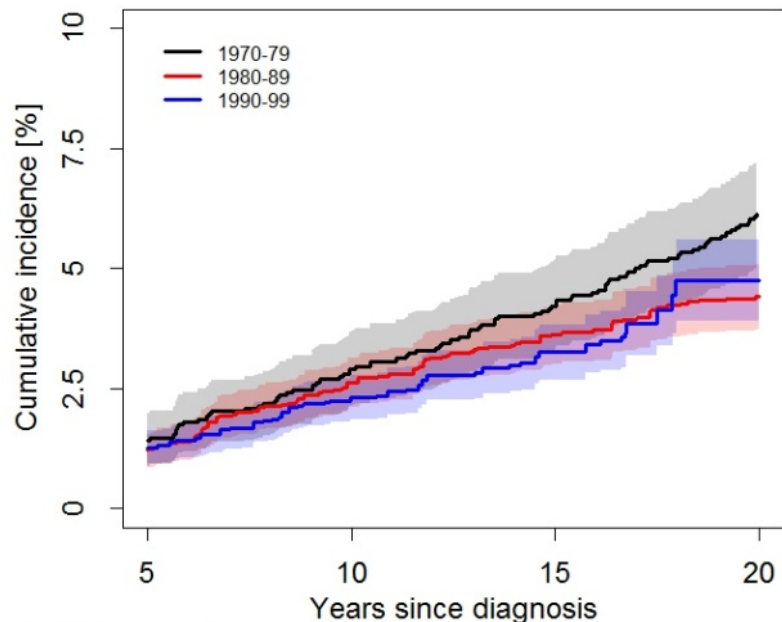

| Number at risk (number censored) |         |
|----------------------------------|---------|
| 1970-79                          | 1824(0) |
| 1980-89                          | 2892(0) |
| 1990-99                          | 1432(0) |

|          |           |           |
|----------|-----------|-----------|
| 1638 (0) | 1557 (2)  | 1452 (84) |
| 2675(40) | 2377(281) | 1905(717) |
| 1322(39) | 805(534)  | 149(1176) |

**Acute myeloid leukemia**

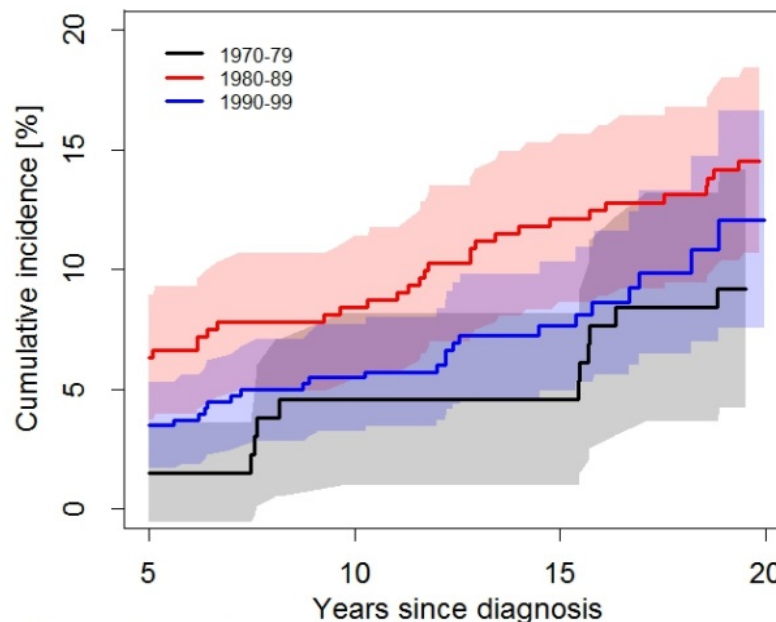

| Number at risk (number censored) |        |
|----------------------------------|--------|
| 1970-79                          | 131(0) |
| 1980-89                          | 333(0) |
| 1990-99                          | 402(0) |

|        |          |         |
|--------|----------|---------|
| 118(0) | 111(1)   | 99 (6)  |
| 288(2) | 260(18)  | 214(52) |
| 369(5) | 205(161) | 32(326) |

### Hodgkin lymphoma

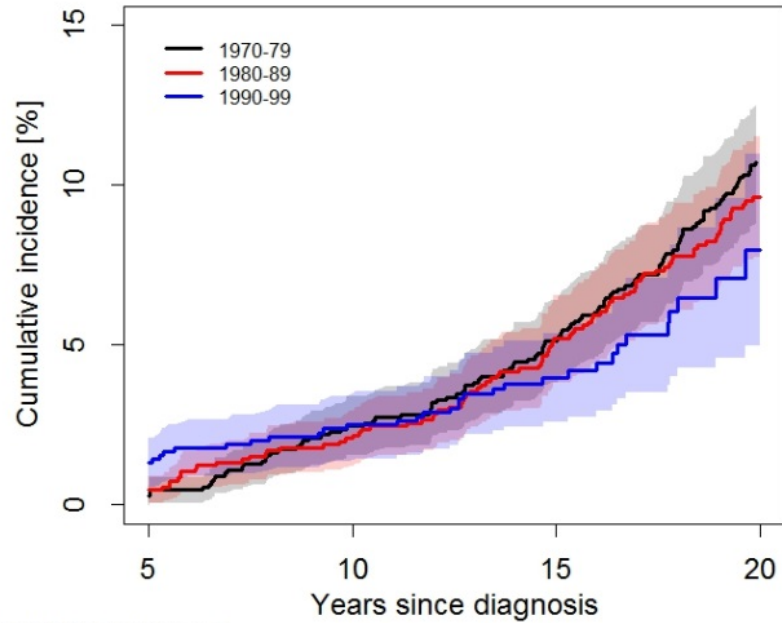

| Number at risk (number censored) |         |
|----------------------------------|---------|
| 1970-79                          | 1097(0) |
| 1980-89                          | 1057(0) |
| 1990-99                          | 842(0)  |

|         |          |          |
|---------|----------|----------|
| 1019(0) | 954(0)   | 816(46)  |
| 994(10) | 864(88)  | 694(200) |
| 795(16) | 455(340) | 87(695)  |

### Non-Hodgkin lymphoma

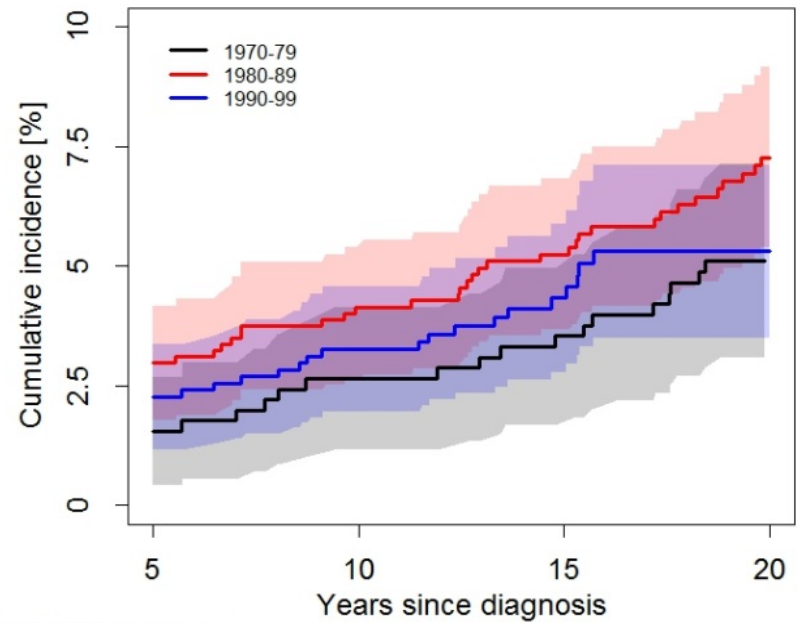

| Number at risk (number censored) |        |
|----------------------------------|--------|
| 1970-79                          | 453(0) |
| 1980-89                          | 774(0) |
| 1990-99                          | 705(0) |

|         |          |          |
|---------|----------|----------|
| 430(0)  | 419(0)   | 385(20)  |
| 712(15) | 637(76)  | 520(175) |
| 661(13) | 410(249) | 94(559)  |

### Astrocytoma

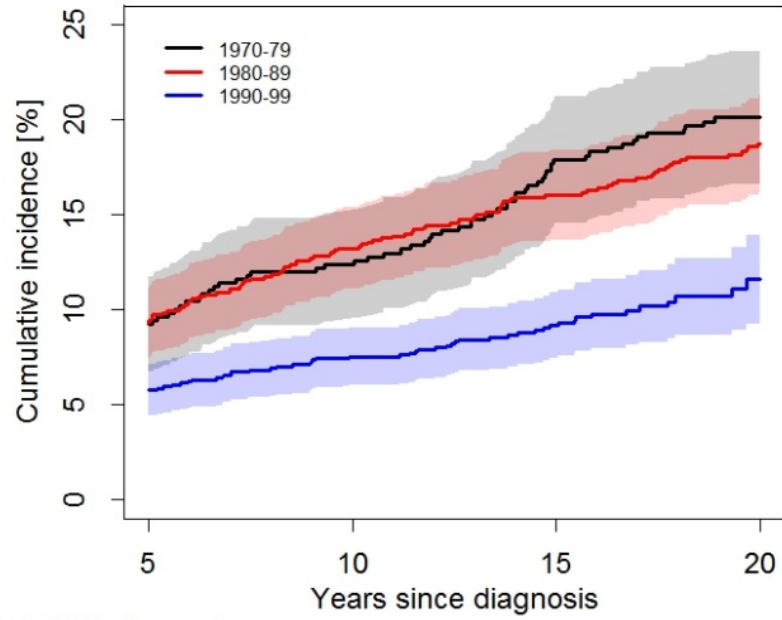

| Number at risk (number censored) |         |          |          |          |
|----------------------------------|---------|----------|----------|----------|
| 1970-79                          | 508(0)  | 425(0)   | 388(1)   | 347(16)  |
| 1980-89                          | 945(0)  | 781(13)  | 677(83)  | 541(188) |
| 1990-99                          | 1140(0) | 1011(14) | 620(371) | 146(827) |

### Medulloblastoma/PNET

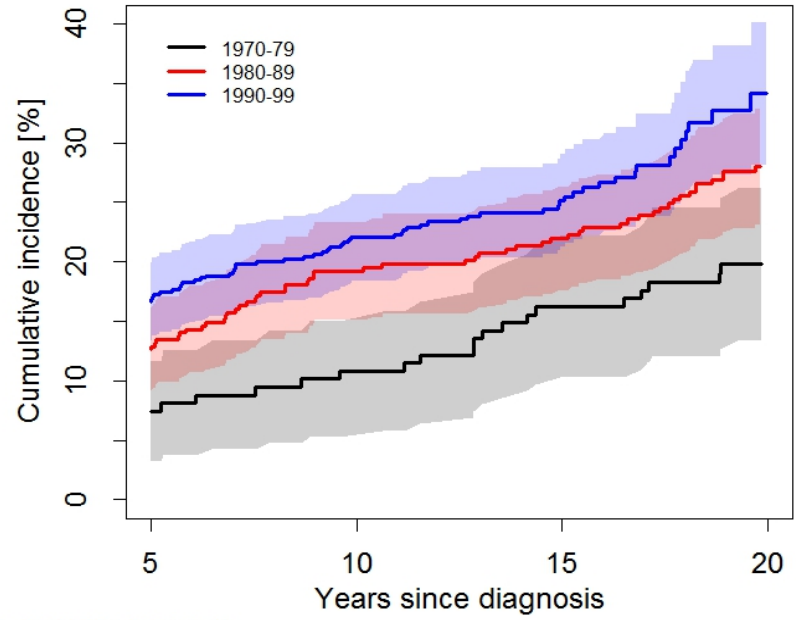

| Number at risk (number censored) |        |        |          |         |
|----------------------------------|--------|--------|----------|---------|
| 1970-79                          | 148(0) | 116(0) | 103(0)   | 89(8)   |
| 1980-89                          | 349(0) | 257(4) | 223(23)  | 177(49) |
| 1990-99                          | 499(0) | 363(7) | 197(153) | 32(298) |

**Wilms tumor**

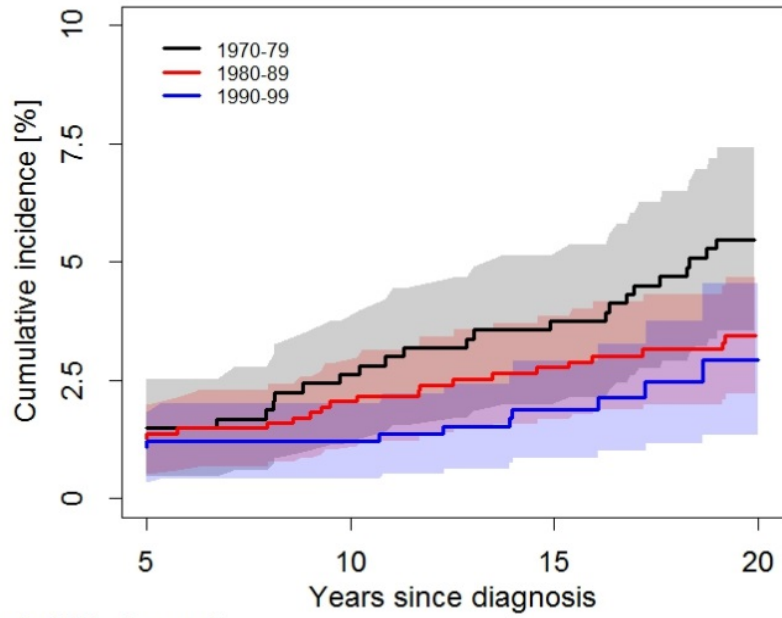

| Number at risk (number censored) |        |         |          |          |
|----------------------------------|--------|---------|----------|----------|
| 1970-79                          | 534(0) | 515(0)  | 502(0)   | 459(29)  |
| 1980-89                          | 877(0) | 845(3)  | 769(72)  | 625(202) |
| 1990-99                          | 737(0) | 709(11) | 465(249) | 106(600) |

**Neuroblastoma**

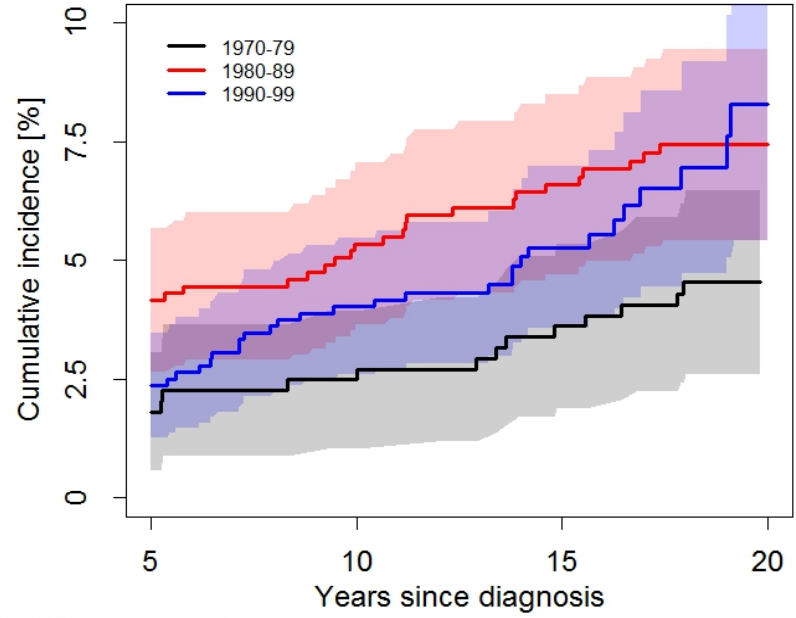

| Number at risk (number censored) |        |         |          |          |
|----------------------------------|--------|---------|----------|----------|
| 1970-79                          | 443(0) | 424(0)  | 413(0)   | 383(23)  |
| 1980-89                          | 674(0) | 613(9)  | 561(51)  | 466(138) |
| 1990-99                          | 720(0) | 649(10) | 379(268) | 96(543)  |

**Soft tissue sarcoma**

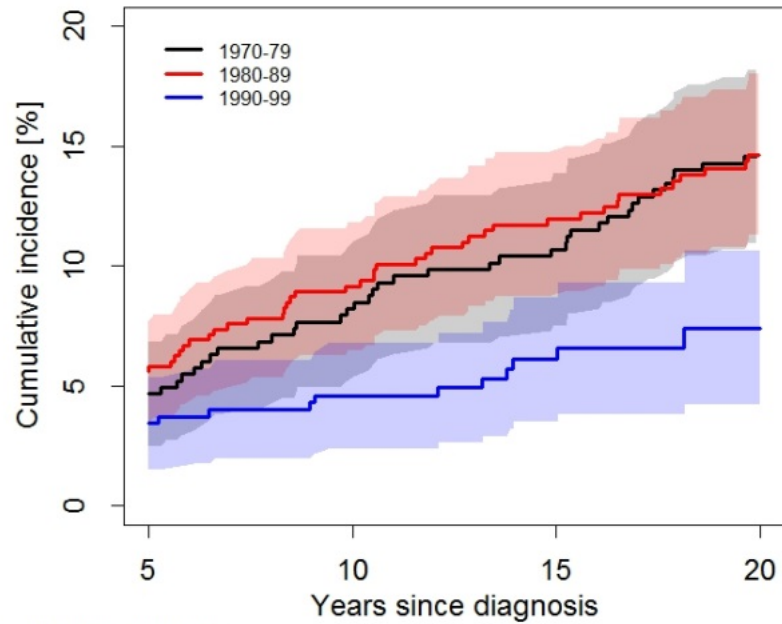

Number at risk (number censored)

|         |        |        |          |         |
|---------|--------|--------|----------|---------|
| 1970-79 | 365(0) | 326(0) | 313(0)   | 282(12) |
| 1980-89 | 448(0) | 392(5) | 341(38)  | 278(86) |
| 1990-99 | 349(0) | 322(4) | 195(122) | 46(267) |

**Ewing sarcoma**

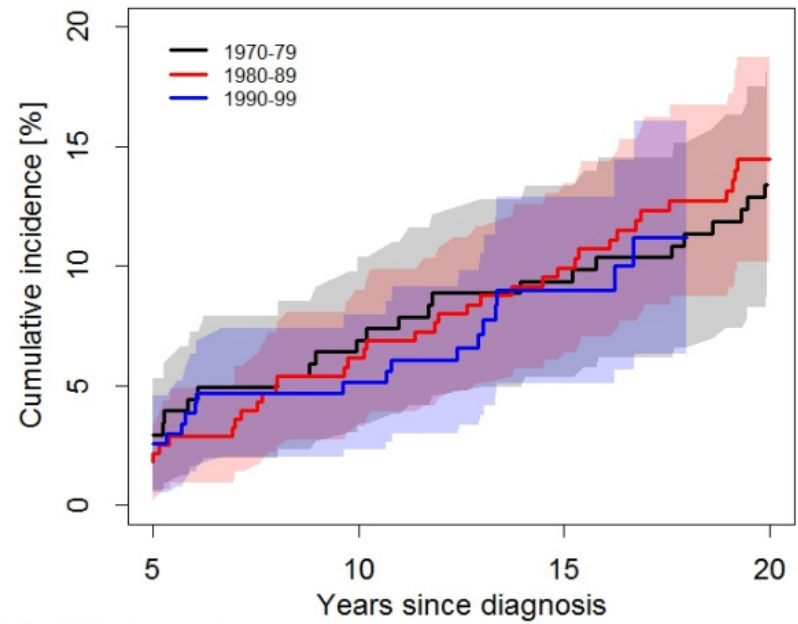

Number at risk (number censored)

|         |        |        |         |         |
|---------|--------|--------|---------|---------|
| 1970-79 | 203(0) | 165(0) | 151(0)  | 136(6)  |
| 1980-89 | 277(0) | 233(3) | 202(17) | 154(52) |
| 1990-99 | 234(0) | 206(5) | 100(99) | 18(179) |



## Osteosarcoma

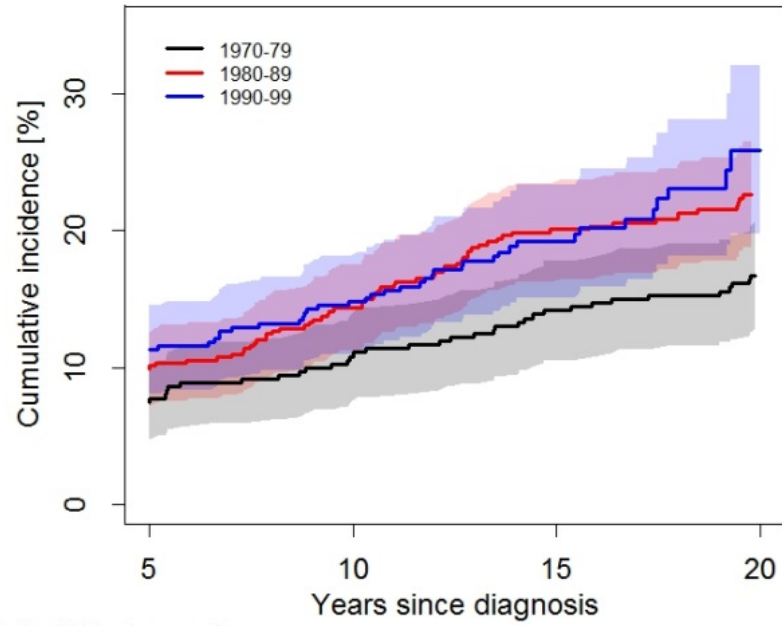

Number at risk (number censored)

|         |        |        |          |         |
|---------|--------|--------|----------|---------|
| 1970-79 | 360(0) | 314(0) | 295(0)   | 265(17) |
| 1980-89 | 474(0) | 380(6) | 327(31)  | 271(74) |
| 1990-99 | 371(0) | 294(2) | 162(117) | 32(237) |

**Appendix Figure 5. Cumulative incidence of grade 3-5 chronic health conditions by diagnosis decade, stratified by sex. Panel A includes all male survivors and siblings. Panel B includes all female survivors and siblings. Panel C includes male survivors of Hodgkin lymphoma. Panel D includes female survivors of Hodgkin lymphoma.**

**A. Males**

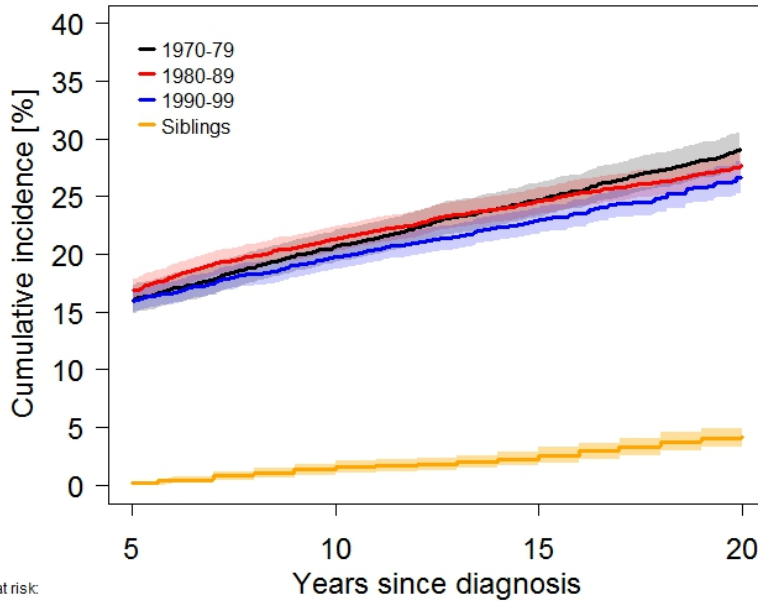

# at risk:

|          |      |      |      |      |
|----------|------|------|------|------|
| 1970-79  | 3311 | 2488 | 2303 | 2027 |
| 1980-89  | 5070 | 3770 | 3239 | 2504 |
| 1990-99  | 4217 | 3141 | 1869 | 397  |
| Siblings | 2352 | 2288 | 2086 | 1658 |

**B. Females**

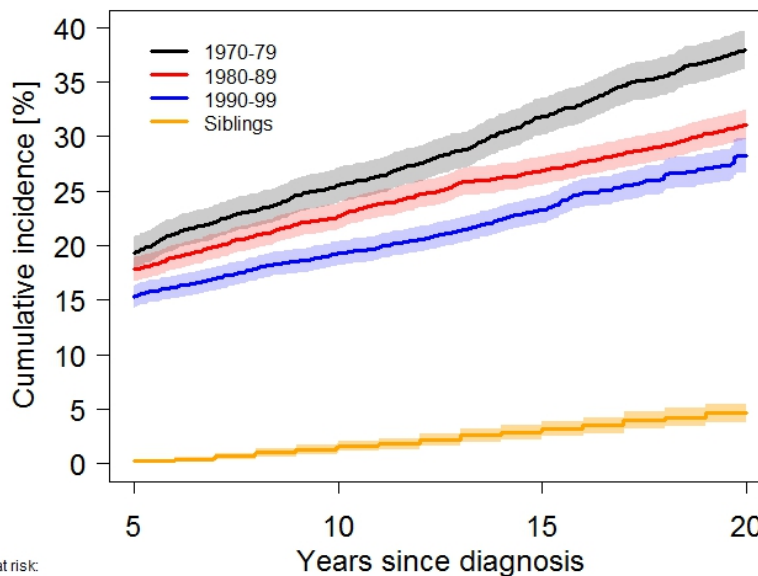

# at risk:

|          |      |      |      |      |
|----------|------|------|------|------|
| 1970-79  | 2885 | 2059 | 1850 | 1584 |
| 1980-89  | 4302 | 3180 | 2772 | 2194 |
| 1990-99  | 3712 | 2800 | 1599 | 305  |
| Siblings | 2553 | 2485 | 2270 | 1834 |

**C. Male Hodgkin lymphoma survivors**

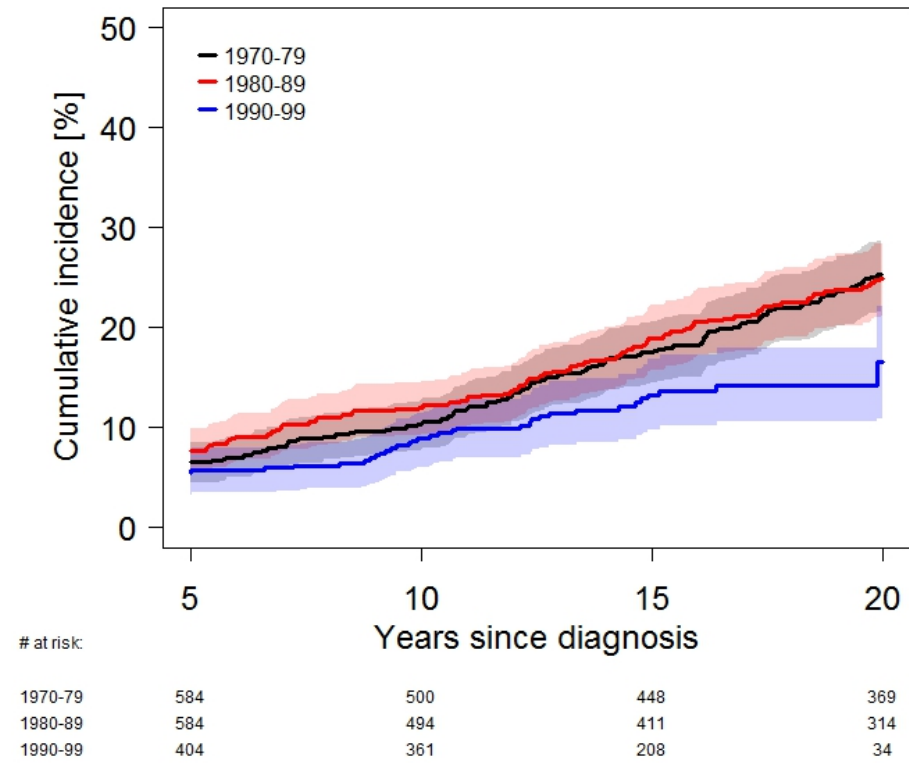

**D. Female Hodgkin lymphoma survivors**

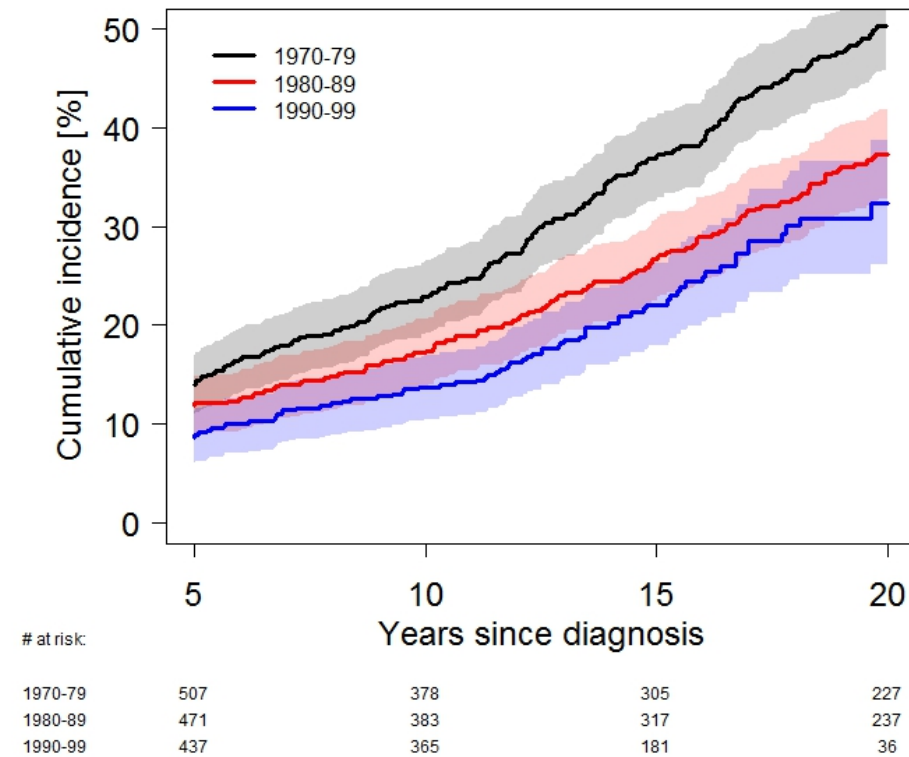

**Appendix Figure 6. Cumulative incidence of grade 3-5 chronic health conditions by diagnosis decade, stratified by race/ethnicity. Panel A includes non-Hispanic white survivors and siblings. Panel B includes survivors and siblings with self-reported race/ethnicity other than non-Hispanic white.**

**A. Non-Hispanic white**

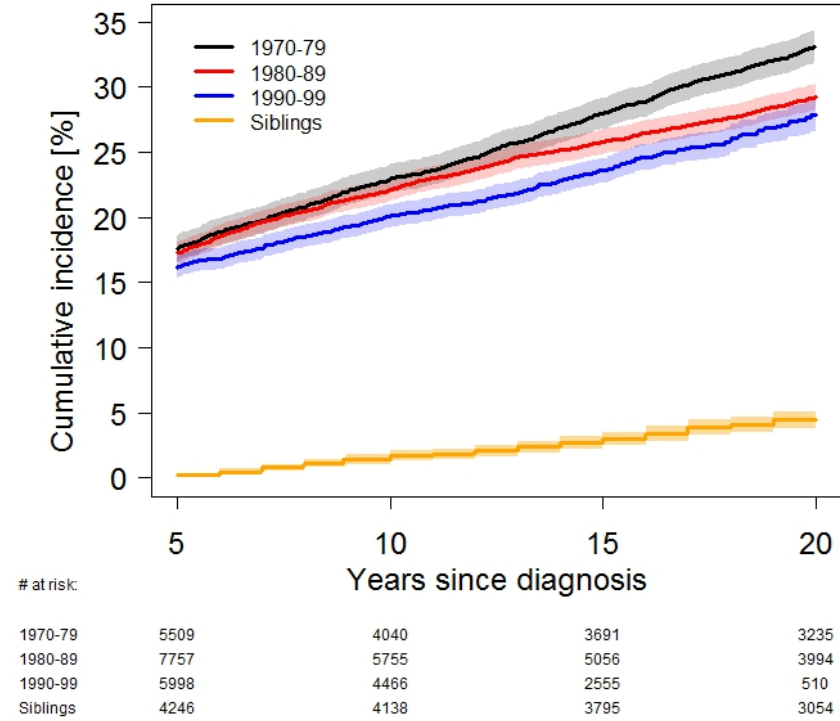

**B. Other race/ethnicity**

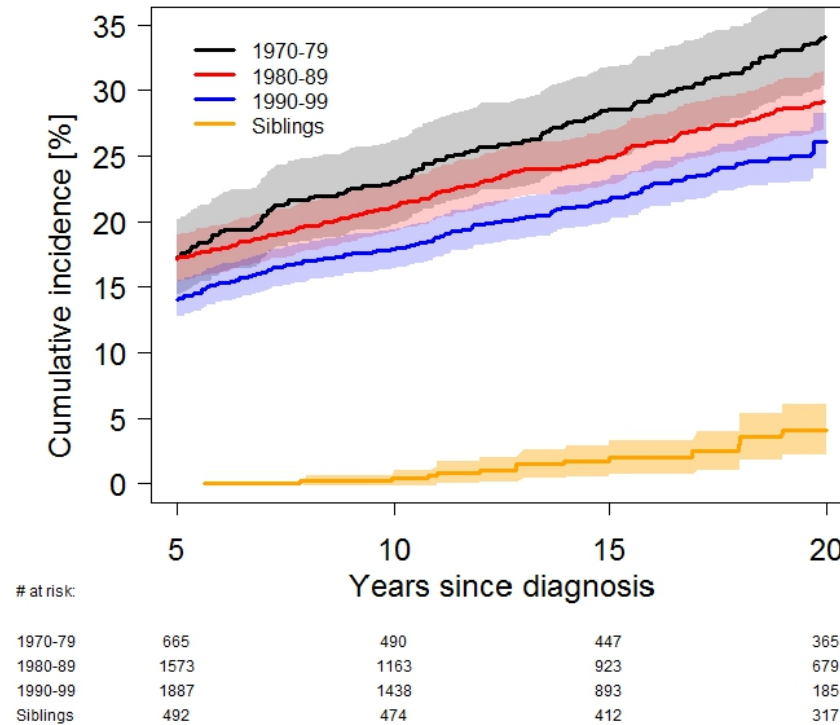

**Appendix Table 1. List of grade 3-4 chronic conditions included in the CCSS categorization matrix, stratified by organ system. Grade 5 conditions are deaths, so no further definition is provided.**

| <b>Chronic Condition</b>  | <b>Grade 3 Definition</b>                                                                                                                                                                                                                                                                                                                                                                                                                                                                                                                                                                                          | <b>Grade 4 Definition</b>                                                                             |
|---------------------------|--------------------------------------------------------------------------------------------------------------------------------------------------------------------------------------------------------------------------------------------------------------------------------------------------------------------------------------------------------------------------------------------------------------------------------------------------------------------------------------------------------------------------------------------------------------------------------------------------------------------|-------------------------------------------------------------------------------------------------------|
| <b>Cardiovascular</b>     |                                                                                                                                                                                                                                                                                                                                                                                                                                                                                                                                                                                                                    |                                                                                                       |
| Coronary artery disease   | Myocardial infarction, angina, or coronary heart disease not requiring cardiac catheterization but on anti-anginal medication                                                                                                                                                                                                                                                                                                                                                                                                                                                                                      | Myocardial infarction requiring cardiac catheterization, angioplasty, or coronary artery bypass graft |
| Heart failure             | Congestive heart failure, requiring medication                                                                                                                                                                                                                                                                                                                                                                                                                                                                                                                                                                     | Heart transplant                                                                                      |
| Arrhythmia                | Arrhythmia, requiring pacemaker                                                                                                                                                                                                                                                                                                                                                                                                                                                                                                                                                                                    | Ventricular fibrillation/flutter                                                                      |
| Valvular heart disease    | Not applicable                                                                                                                                                                                                                                                                                                                                                                                                                                                                                                                                                                                                     | Heart valve replacement                                                                               |
| Stroke                    | Occlusion of cerebral arteries                                                                                                                                                                                                                                                                                                                                                                                                                                                                                                                                                                                     | Stroke/cerebrovascular accident                                                                       |
| Pericardial disease       | Pericardial disease requiring surgical intervention                                                                                                                                                                                                                                                                                                                                                                                                                                                                                                                                                                | Not applicable                                                                                        |
| Other cardiac conditions  | Thromboangiitis obliterans (Buerger disease)<br>Hypotension, unspecified<br>Other chronic pulmonary heart disease                                                                                                                                                                                                                                                                                                                                                                                                                                                                                                  | Not applicable                                                                                        |
| Thromboembolic disease    | Blood clot in head, lung, arm, leg, or pelvis, not otherwise specified                                                                                                                                                                                                                                                                                                                                                                                                                                                                                                                                             | Pulmonary embolism and infarction<br>Embolism and thrombosis of unspecified artery                    |
| Other vascular conditions | Aorta-subclavian-carotid bypass<br>Other (peripheral) vascular shunt or bypass<br>Other repair of aneurysm<br>Repair of arteriovenous fistula                                                                                                                                                                                                                                                                                                                                                                                                                                                                      | Other excision of vessels, aorta, abdominal (aorta)                                                   |
| Hypertension              | Hypertensive chronic kidney disease<br>Hypertensive heart disease                                                                                                                                                                                                                                                                                                                                                                                                                                                                                                                                                  | Not applicable                                                                                        |
| <b>Endocrine</b>          |                                                                                                                                                                                                                                                                                                                                                                                                                                                                                                                                                                                                                    |                                                                                                       |
| Thyroid nodules           | Thyroid nodules, requiring surgery                                                                                                                                                                                                                                                                                                                                                                                                                                                                                                                                                                                 | Not applicable                                                                                        |
| Diabetes                  | Diabetes, requiring insulin                                                                                                                                                                                                                                                                                                                                                                                                                                                                                                                                                                                        | Not applicable                                                                                        |
| Gonadal dysfunction       | Postablative ovarian failure or testicular hypofunction<br>Premature menopause, onset <40 years of age<br>Female infertility<br>Azoospermia                                                                                                                                                                                                                                                                                                                                                                                                                                                                        | Not applicable                                                                                        |
| Other hormone conditions  | Panhypopituitarism<br>Diabetes insipidus<br>Corticoadrenal hormone insufficiency<br>Glucocorticoid deficiency                                                                                                                                                                                                                                                                                                                                                                                                                                                                                                      | Not applicable                                                                                        |
| <b>Gastrointestinal</b>   |                                                                                                                                                                                                                                                                                                                                                                                                                                                                                                                                                                                                                    |                                                                                                       |
| Hepatitis                 | Cirrhosis                                                                                                                                                                                                                                                                                                                                                                                                                                                                                                                                                                                                          | Liver transplant                                                                                      |
| Intestinal obstruction    | Surgery for intestinal obstruction                                                                                                                                                                                                                                                                                                                                                                                                                                                                                                                                                                                 | Not applicable                                                                                        |
| <b>Hearing</b>            |                                                                                                                                                                                                                                                                                                                                                                                                                                                                                                                                                                                                                    |                                                                                                       |
| Loss of hearing           | Hearing loss, requiring a hearing aid<br>Deafness in one ear not completely corrected by hearing aid                                                                                                                                                                                                                                                                                                                                                                                                                                                                                                               | Deafness in both ears not completely corrected by hearing aid                                         |
| <b>Musculoskeletal</b>    |                                                                                                                                                                                                                                                                                                                                                                                                                                                                                                                                                                                                                    |                                                                                                       |
| Amputation                | Total ostectomy, femur<br>Disarticulation of elbow<br>Amputation through humerus, upper arm amputation<br>Disarticulation of shoulder<br>Interthoracoscapular amputation, forequarter amputation<br>Disarticulation of knee<br>Amputation above knee, amputation of leg through femur, amputation of thigh<br>Disarticulation of hip<br>Abdominopelvic amputation, hemipelvectomy, hindquarter amputation<br>Lower leg or ankle reattachment, reattachment of leg not otherwise specified<br>Traumatic amputation of arm and hand, unilateral, at or above elbow<br>Upper limb amputation<br>Lower limb amputation | Not applicable                                                                                        |
| Joint replacement         | Major joint replacement                                                                                                                                                                                                                                                                                                                                                                                                                                                                                                                                                                                            | Not applicable                                                                                        |

|                                   |                                                                                                                                                                                                                                         |                                                                                   |
|-----------------------------------|-----------------------------------------------------------------------------------------------------------------------------------------------------------------------------------------------------------------------------------------|-----------------------------------------------------------------------------------|
| <b><u>Neurologic</u></b>          |                                                                                                                                                                                                                                         |                                                                                   |
| Balance                           | Problems with balance or ability to manipulate objects, severe                                                                                                                                                                          | Problems with balance or ability to manipulate objects, disabling                 |
| Paralysis                         | Disorders of accessory (11 <sup>th</sup> ) nerve                                                                                                                                                                                        | Hemiplegia; quadriplegia                                                          |
| Other neurologic conditions       | Intracranial ventricular shunt or anastomosis<br>Ventricular shunt to abdominal cavity and organs<br>Irrigation and exploration of ventricular shunt<br>Replacement of ventricular shunt<br>Multiple sclerosis<br>Difficulty in walking | Coma                                                                              |
| <b><u>Pulmonary</u></b>           |                                                                                                                                                                                                                                         |                                                                                   |
| Emphysema                         | Emphysema, requiring medication                                                                                                                                                                                                         | Not applicable                                                                    |
| Pulmonary fibrosis                | Requiring oxygen therapy                                                                                                                                                                                                                | Not applicable                                                                    |
| Other respiratory conditions      | Primary pulmonary hypertension                                                                                                                                                                                                          | Chronic respiratory failure<br>Respiratory arrest<br>Respirator dependency status |
| <b><u>Renal</u></b>               |                                                                                                                                                                                                                                         |                                                                                   |
| Renal failure                     | Not applicable                                                                                                                                                                                                                          | Dialysis or kidney transplant                                                     |
| Urinary incontinence              | Neurogenic bladder                                                                                                                                                                                                                      | Not applicable                                                                    |
| Other renal conditions            | Nephrotic syndrome with unspecified pathologic lesion in kidney                                                                                                                                                                         | Rupture of bladder, nontraumatic                                                  |
| <b><u>Secondary neoplasms</u></b> |                                                                                                                                                                                                                                         |                                                                                   |
|                                   | Thyroid carcinoma<br>Benign meningiomas requiring resection<br>Lobular cancer in situ of the breast                                                                                                                                     | Invasive malignancies<br>Ductal carcinoma in situ of the breast                   |
| <b><u>Vision and eye</u></b>      |                                                                                                                                                                                                                                         |                                                                                   |
| Cataract                          | Cataracts, requiring surgery                                                                                                                                                                                                            | Not applicable                                                                    |
| Blindness                         | Legally blind in only one eye                                                                                                                                                                                                           | Legally blind in both eyes or loss of an eye                                      |

**Appendix Table 2. Descriptive characteristics of CCSS participants with and without data collected on treatment exposures.**

|                                 |                                | Missing Treatment Information <sup>1</sup> |      | Treatment Information |       |      |
|---------------------------------|--------------------------------|--------------------------------------------|------|-----------------------|-------|------|
|                                 |                                | N=1909                                     |      | N=21692               |       |      |
|                                 |                                | N                                          | %    | N                     | %     |      |
| Sex                             | Female                         | 760                                        | 39.8 | 10187                 | 47.0  |      |
|                                 | Male                           | 1149                                       | 60.2 | 11505                 | 53.0  |      |
| Race/ethnicity                  | Non-Hispanic White             | 1386                                       | 72.6 | 17960                 | 82.8  |      |
|                                 | Non-Hispanic Black             | 269                                        | 14.1 | 1231                  | 5.7   |      |
|                                 | Hispanic                       | 160                                        | 8.4  | 1624                  | 7.5   |      |
|                                 | Other                          | 94                                         | 4.9  | 877                   | 4.0   |      |
| Age at diagnosis                | 0-9                            | 1230                                       | 64.4 | 13581                 | 62.6  |      |
|                                 | 10-20                          | 679                                        | 35.6 | 8111                  | 37.4  |      |
| Time since diagnosis            | 5-9 years                      | 123                                        | 6.4  | 1162                  | 5.4   |      |
|                                 | 10-19 years                    | 668                                        | 35.0 | 8748                  | 40.3  |      |
|                                 | 20-29 years                    | 831                                        | 43.5 | 9033                  | 41.6  |      |
|                                 | 30+ years                      | 287                                        | 15.0 | 2749                  | 12.7  |      |
| Diagnosis                       | Acute lymphoblastic leukemia   | 535                                        | 28.0 | 5613                  | 25.9  |      |
|                                 | Acute myeloid leukemia         | 44                                         | 2.3  | 822                   | 3.8   |      |
|                                 | Astrocytomas                   | 171                                        | 9.0  | 2423                  | 11.2  |      |
|                                 | Ewing sarcoma                  | 52                                         | 2.7  | 662                   | 3.1   |      |
|                                 | Hodgkin lymphoma               | 267                                        | 14.0 | 2729                  | 12.6  |      |
|                                 | Wilms tumor                    | 195                                        | 10.2 | 1953                  | 9.0   |      |
|                                 | Medulloblastoma, PNET          | 58                                         | 3.0  | 939                   | 4.3   |      |
|                                 | Neuroblastoma                  | 142                                        | 7.4  | 1696                  | 7.8   |      |
|                                 | Non-Hodgkin lymphoma           | 178                                        | 9.3  | 1754                  | 8.1   |      |
|                                 | Osteosarcoma                   | 106                                        | 5.6  | 1099                  | 5.1   |      |
|                                 | Soft tissue sarcoma            | 89                                         | 4.7  | 1073                  | 4.9   |      |
|                                 | Other diagnoses                | 72                                         | 3.8  | 929                   | 4.2   |      |
|                                 | Highest level of education     | ≤High school graduate                      | 813  | 42.6                  | 7332  | 33.8 |
|                                 |                                | >High school graduate                      | 1047 | 54.8                  | 14157 | 65.3 |
| Unknown                         |                                | 49                                         | 2.6  | 203                   | 0.9   |      |
| Household income                | <\$60,000                      | 1078                                       | 56.5 | 11377                 | 52.5  |      |
|                                 | \$60,000+                      | 516                                        | 27.0 | 8227                  | 37.9  |      |
|                                 | Unknown                        | 315                                        | 16.5 | 2088                  | 9.6   |      |
| CTCAE chronic health conditions | Any grade 3-5 condition        | 672                                        | 35.2 | 7633                  | 35.2  |      |
|                                 | 2 or more grade 3-5 conditions | 224                                        | 11.7 | 2725                  | 12.6  |      |

<sup>1</sup>Participants did not provide consent for release of medical records

**Appendix Table 3. Proportion of baseline participants at each 5-year follow-up interval who were eligible to provide outcome data within that interval but were missing data due to non-response to follow-up questionnaires.**

|                               |                               | Missing Data Due to Non-Response Beyond This Point of Follow-Up |                         |                         |
|-------------------------------|-------------------------------|-----------------------------------------------------------------|-------------------------|-------------------------|
|                               |                               | 10 years post-diagnosis                                         | 15 years post-diagnosis | 20 years post-diagnosis |
|                               |                               | %                                                               | %                       | %                       |
| Year of diagnosis             | 1970-1979 <sup>1</sup>        | 0.0                                                             | 0.1                     | 5.0                     |
|                               | 1980-1989                     | 1.4                                                             | 9.0                     | 21.6                    |
|                               | 1990-1999 <sup>2</sup>        | 0.0                                                             | 0.0                     | 0.0                     |
| Sex                           | Female                        | 0.5                                                             | 3.6                     | 12.5                    |
|                               | Male                          | 0.6                                                             | 4.7                     | 15.5                    |
| Race/Ethnicity                | Non-Hispanic white            | 0.5                                                             | 3.6                     | 12.7                    |
|                               | Non-Hispanic black            | 0.7                                                             | 7.0                     | 24.4                    |
|                               | Hispanic                      | 0.7                                                             | 5.7                     | 19.3                    |
|                               | Other                         | 0.6                                                             | 9.8                     | 23.3                    |
| Age at Primary Diagnosis(yrs) | 0-4                           | 0.5                                                             | 4.5                     | 16.0                    |
|                               | 5-9                           | 0.8                                                             | 5.0                     | 15.0                    |
|                               | 10-14                         | 0.7                                                             | 3.6                     | 12.5                    |
|                               | 15-20                         | 0.4                                                             | 3.0                     | 9.7                     |
| Primary Diagnosis             | Acute lymphoblastic leukemia  | 0.8                                                             | 5.3                     | 17.1                    |
|                               | Acute myeloid leukemia        | 0.2                                                             | 2.8                     | 10.7                    |
|                               | Bone tumors                   | 0.7                                                             | 3.6                     | 12.4                    |
|                               | CNS tumors                    | 0.5                                                             | 3.6                     | 12.7                    |
|                               | Hodgkin lymphoma              | 0.4                                                             | 3.5                     | 10.9                    |
|                               | Wilms tumor                   | 0.1                                                             | 3.8                     | 15.0                    |
|                               | Neuroblastoma                 | 0.5                                                             | 3.6                     | 14.0                    |
|                               | Non-Hodgkin lymphoma          | 0.9                                                             | 5.2                     | 14.9                    |
|                               | Soft tissue sarcoma           | 0.4                                                             | 4.1                     | 11.7                    |
| Age at baseline               | 0-19                          | 1.3                                                             | 9.8                     | 28.3                    |
|                               | 20-29                         | 0.4                                                             | 2.8                     | 10.8                    |
|                               | 30-39                         | 0.0                                                             | 0.9                     | 4.5                     |
|                               | 40+                           | 0.0                                                             | 0.0                     | 0.0                     |
| Health Status at baseline     | Excellent                     | 0.7                                                             | 5.3                     | 18.1                    |
|                               | Fair                          | 0.5                                                             | 4.0                     | 11.9                    |
|                               | Good                          | 0.4                                                             | 4.1                     | 12.6                    |
|                               | Poor                          | 1.2                                                             | 3.6                     | 11.9                    |
|                               | Very good                     | 0.6                                                             | 3.9                     | 13.4                    |
| Education at baseline         | <18 years of age              | 4.7                                                             | 16.5                    | 35.3                    |
|                               | ≤ High school                 | 1.2                                                             | 9.2                     | 26.9                    |
|                               | Post-high school/some college | 0.4                                                             | 2.8                     | 10.5                    |
|                               | College graduate              | 0.1                                                             | 1.3                     | 5.3                     |

<sup>1</sup> The baseline questionnaire was administered to survivors diagnosed from 1970-1986 starting in 1992.



99% of survivors diagnosed from 1970-79 were at least 15 years post-diagnosis at the time of the baseline questionnaire, and 100% were at least 10 years post-diagnosis.

<sup>2</sup> Survivors diagnosed from 1987-1999 were administered the baseline questionnaire starting in 2008, and all data for this group was obtained from the baseline questionnaire.

**Appendix Table 4. Treatment exposures by diagnosis decade within specific primary cancer diagnosis groups**

|                                                                         |                    | 1970-1979 |      | 1980-1989 |      | 1990-1999 |      |
|-------------------------------------------------------------------------|--------------------|-----------|------|-----------|------|-----------|------|
|                                                                         |                    | N         | %    | N         | %    | N         | %    |
| <b><u>Acute lymphoblastic leukemia</u></b>                              |                    |           |      |           |      |           |      |
| Participants with treatment information                                 |                    | 1602      |      | 2608      |      | 1403      |      |
| Cranial RT max dose (Gy)                                                | None               | 247       | 16.1 | 1113      | 43.9 | 992       | 72.4 |
|                                                                         | >0 - <20           | 337       | 22.0 | 1038      | 41.0 | 298       | 21.8 |
|                                                                         | ≥20                | 950       | 61.9 | 382       | 15.1 | 80        | 5.8  |
|                                                                         | Unknown            | 68        |      | 75        |      | 33        |      |
| Anthracycline, doxorubicin equivalent dose (mg/m <sup>2</sup> )         | None               | 1027      | 68.1 | 1150      | 46.2 | 171       | 12.6 |
|                                                                         | 1-<150             | 124       | 8.2  | 514       | 20.6 | 680       | 50.1 |
|                                                                         | 150-<300           | 138       | 9.2  | 680       | 16.5 | 393       | 29.0 |
|                                                                         | 300-<450           | 130       | 8.6  | 298       | 12.0 | 105       | 7.7  |
|                                                                         | 450-<600           | 74        | 4.9  | 91        | 3.7  | 4         | 0.3  |
|                                                                         | ≥600               | 16        | 1.1  | 27        | 1.1  | 4         | 0.3  |
|                                                                         | Unknown            | 93        |      | 118       |      | 46        |      |
| Epipodophyllotoxin (mg/m <sup>2</sup> )                                 | None               | 1513      | 95.8 | 2057      | 81.3 | 837       | 61.2 |
|                                                                         | 1-<1000            | 41        | 2.6  | 75        | 3.0  | 88        | 6.4  |
|                                                                         | 1000-<4000         | 16        | 1.0  | 137       | 5.4  | 214       | 15.7 |
|                                                                         | ≥4000              | 9         | 0.6  | 262       | 10.4 | 228       | 16.7 |
|                                                                         | Unknown            | 23        |      | 77        |      | 36        |      |
| Methotrexate                                                            | No                 | 1073      | 68.6 | 1403      | 55.1 | 471       | 34.0 |
|                                                                         | Yes                | 491       | 31.4 | 1144      | 44.9 | 914       | 66.0 |
|                                                                         | Unknown            | 38        |      | 61        |      | 18        |      |
| Steroids                                                                | None               | 26        | 1.6  | 67        | 2.6  | 93        | 3.3  |
|                                                                         | Prednisone only    | 1454      | 91.3 | 2057      | 79.3 | 572       | 40.9 |
|                                                                         | Dexamethasone only | 24        | 1.5  | 15        | 0.6  | 96        | 6.9  |
|                                                                         | Both               | 88        | 5.5  | 454       | 17.5 | 636       | 45.5 |
|                                                                         | Unknown            | 10        |      | 15        |      | 6         |      |
| <b><u>Hodgkin lymphoma</u></b>                                          |                    |           |      |           |      |           |      |
| Participants with treatment information                                 |                    | 955       |      | 943       |      | 831       |      |
| Any RT max dose (Gy)                                                    | None               | 53        | 5.8  | 114       | 12.6 | 175       | 22.6 |
|                                                                         | >0-<20             | 6         | 0.7  | 28        | 3.1  | 35        | 4.5  |
|                                                                         | 20-<30             | 81        | 8.8  | 246       | 27.2 | 402       | 51.8 |
|                                                                         | 30-<40             | 340       | 37.0 | 237       | 26.2 | 99        | 12.8 |
|                                                                         | 40-<50             | 397       | 43.2 | 256       | 28.3 | 54        | 7.0  |
|                                                                         | ≥50                | 43        | 4.7  | 24        | 2.7  | 11        | 1.4  |
|                                                                         | Unknown            | 35        |      | 38        |      | 55        |      |
| Alkylating agent, cyclophosphamide equivalent dose (mg/m <sup>2</sup> ) | None               | 358       | 47.0 | 329       | 40.3 | 226       | 29.1 |
|                                                                         | 1-<4000            | 24        | 3.2  | 31        | 3.8  | 59        | 7.6  |
|                                                                         | 4000-<8000         | 67        | 8.8  | 139       | 17.0 | 365       | 47.0 |
|                                                                         | 8000-<12000        | 126       | 16.5 | 166       | 20.3 | 78        | 10.0 |
|                                                                         | 12000-<16000       | 106       | 13.9 | 113       | 13.8 | 23        | 3.0  |
|                                                                         | 16000-<20000       | 35        | 4.6  | 19        | 2.3  | 11        | 1.4  |
|                                                                         | ≥20000             | 46        | 6.0  | 20        | 2.5  | 15        | 1.9  |
|                                                                         | Unknown            | 193       |      | 126       |      | 54        |      |
| Anthracycline, doxorubicin equivalent dose (mg/m <sup>2</sup> )         | None               | 827       | 88.9 | 512       | 56.6 | 95        | 11.9 |
|                                                                         | 1-<150             | 12        | 1.3  | 118       | 13.0 | 198       | 24.8 |
|                                                                         | 150-<300           | 44        | 4.7  | 194       | 21.4 | 434       | 54.5 |
|                                                                         | ≥300               | 47        | 5.1  | 81        | 9.0  | 70        | 8.8  |
|                                                                         | Unknown            | 25        |      | 38        |      | 34        |      |
| Platinum (mg/m <sup>2</sup> )                                           | None               | 944       | 99.8 | 929       | 99.2 | 779       | 95.0 |
|                                                                         | 1-<400             | 2         | 0.2  | 7         | 0.8  | 23        | 2.8  |
|                                                                         | ≥400               | 0         | 0.0  | 1         | 0.1  | 18        | 2.2  |
|                                                                         | Unknown            | 9         |      | 6         |      | 11        |      |
| Bleomycin                                                               | No                 | 865       | 91.3 | 533       | 56.9 | 291       | 35.6 |
|                                                                         | Yes                | 82        | 8.7  | 403       | 43.1 | 526       | 64.4 |
|                                                                         | Unknown            | 8         |      | 7         |      | 14        |      |
| Splenectomy                                                             | No                 | 233       | 24.5 | 381       | 41.1 | 672       | 90.3 |
|                                                                         | Yes                | 720       | 75.6 | 547       | 58.9 | 72        | 9.7  |
|                                                                         | Unknown            | 2         |      | 15        |      | 87        |      |
| <b><u>Astrocytoma</u></b>                                               |                    |           |      |           |      |           |      |
| Participants with treatment information                                 |                    | 450       |      | 869       |      | 1104      |      |
| Cranial RT max dose (Gy)                                                | None               | 150       | 35.5 | 394       | 48.1 | 759       | 71.8 |
|                                                                         | >0-<50             | 147       | 34.8 | 147       | 17.9 | 67        | 6.3  |

|                                                                         |              |     |       |     |      |     |       |
|-------------------------------------------------------------------------|--------------|-----|-------|-----|------|-----|-------|
|                                                                         | 50-<60       | 98  | 23.2  | 229 | 27.9 | 192 | 18.2  |
|                                                                         | ≥60          | 28  | 6.6   | 50  | 6.1  | 39  | 3.7   |
|                                                                         | Unknown      | 27  |       | 49  |      | 47  |       |
| Alkylating agents                                                       | No           | 397 | 88.2  | 724 | 83.3 | 945 | 85.6  |
|                                                                         | Yes          | 49  | 10.9  | 136 | 15.7 | 145 | 13.1  |
|                                                                         | Unknown      | 4   |       | 9   |      | 14  |       |
| Platinum agents                                                         | No           | 444 | 99.3  | 785 | 91.0 | 889 | 81.4  |
|                                                                         | Yes          | 3   | 0.7   | 78  | 9.0  | 203 | 18.6  |
|                                                                         | Unknown      | 3   |       | 6   |      | 12  |       |
| <b><u>Wilms tumor</u></b>                                               |              |     |       |     |      |     |       |
| Participants with treatment information                                 |              |     |       |     |      |     |       |
| Abdomen/pelvis RT max dose (Gy)                                         | None         | 102 | 23.1  | 377 | 49.7 | 358 | 52.1  |
|                                                                         | >0-<20       | 44  | 10.0  | 173 | 22.8 | 293 | 42.7  |
|                                                                         | 20-<30       | 149 | 33.7  | 177 | 23.3 | 23  | 3.4   |
|                                                                         | 30-<40       | 120 | 27.2  | 23  | 3.0  | 10  | 1.5   |
|                                                                         | ≥40          | 27  | 6.1   | 9   | 1.2  | 3   | 0.4   |
|                                                                         | Unknown      | 12  |       | 24  |      | 29  |       |
| Anthracycline, doxorubicin equivalent dose (mg/m <sup>2</sup> )         | None         | 328 | 74.7  | 393 | 51.7 | 337 | 47.7  |
|                                                                         | 1-<150       | 8   | 1.8   | 44  | 5.8  | 187 | 26.5  |
|                                                                         | 150-<300     | 66  | 15.0  | 215 | 28.3 | 146 | 20.7  |
|                                                                         | ≥300         | 37  | 8.4   | 108 | 14.2 | 37  | 5.2   |
|                                                                         | Unknown      | 15  |       | 23  |      | 9   |       |
| Platinum agents                                                         | No           | 453 | 99.8  | 768 | 98.3 | 664 | 92.7  |
|                                                                         | Yes          | 1   | 0.2   | 13  | 1.7  | 52  | 7.3   |
|                                                                         | Unknown      | 0   |       | 2   |      | 0   |       |
| Vincristine                                                             | No           | 63  | 14.2  | 32  | 4.2  | 22  | 3.1   |
|                                                                         | Yes          | 380 | 85.8  | 734 | 95.8 | 692 | 96.9  |
|                                                                         | Unknown      | 11  |       | 17  |      | 2   |       |
| Splenectomy                                                             | No           | 436 | 96.0  | 779 | 99.5 | 716 | 100.0 |
|                                                                         | Yes          | 18  | 4.0   | 4   | 0.5  | 0   | 0.0   |
| <b><u>Non-Hodgkin lymphoma</u></b>                                      |              |     |       |     |      |     |       |
| Participants with treatment information                                 |              |     |       |     |      |     |       |
| Any RT max dose (Gy)                                                    | None         | 72  | 19.8  | 350 | 52.1 | 573 | 86.0  |
|                                                                         | >0-<20       | 24  | 6.6   | 95  | 14.1 | 48  | 7.2   |
|                                                                         | 20-<30       | 104 | 28.7  | 146 | 21.7 | 11  | 1.7   |
|                                                                         | 30-<40       | 108 | 29.8  | 50  | 7.4  | 18  | 2.7   |
|                                                                         | 40-<50       | 42  | 11.6  | 23  | 3.4  | 15  | 2.3   |
|                                                                         | ≥50          | 13  | 3.6   | 8   | 1.2  | 1   | 0.2   |
|                                                                         | Unknown      | 17  |       | 20  |      | 16  |       |
| Alkylating agent, cyclophosphamide equivalent dose (mg/m <sup>2</sup> ) | None         | 63  | 19.7  | 40  | 6.3  | 56  | 8.6   |
|                                                                         | 1-<4000      | 50  | 15.6  | 143 | 22.5 | 158 | 24.2  |
|                                                                         | 4000-<8000   | 38  | 11.9  | 177 | 27.8 | 268 | 41.0  |
|                                                                         | 8000-<12000  | 66  | 20.6  | 133 | 20.9 | 125 | 19.1  |
|                                                                         | 12000-<16000 | 45  | 14.1  | 67  | 10.5 | 17  | 2.6   |
|                                                                         | 16000-<20000 | 23  | 7.2   | 51  | 8.0  | 15  | 2.3   |
|                                                                         | ≥20000       | 35  | 10.9  | 25  | 3.9  | 14  | 2.1   |
|                                                                         | Unknown      | 60  |       | 56  |      | 29  |       |
| Anthracycline, doxorubicin equivalent dose (mg/m <sup>2</sup> )         | None         | 206 | 59.0  | 192 | 29.5 | 76  | 11.6  |
|                                                                         | 1-<100       | 8   | 2.3   | 15  | 2.3  | 75  | 11.4  |
|                                                                         | 100-<250     | 32  | 9.2   | 178 | 27.3 | 365 | 55.5  |
|                                                                         | 250-<400     | 60  | 17.2  | 193 | 29.6 | 127 | 19.3  |
|                                                                         | ≥400         | 43  | 12.3  | 74  | 11.4 | 15  | 2.3   |
|                                                                         | Unknown      | 31  |       | 40  |      | 24  |       |
| Platinum (mg/m <sup>2</sup> )                                           | None         | 379 | 100.0 | 676 | 98.3 | 609 | 90.1  |
|                                                                         | 1-<400       | 0   | 0.0   | 9   | 1.3  | 35  | 5.2   |
|                                                                         | ≥400         | 0   | 0.0   | 3   | 0.4  | 32  | 4.7   |
|                                                                         | Unknown      | 1   |       | 4   |      | 6   |       |
| Bleomycin                                                               | No           | 355 | 93.9  | 654 | 94.7 | 672 | 98.8  |
|                                                                         | Yes          | 23  | 6.1   | 37  | 5.4  | 8   | 1.2   |
|                                                                         | Unknown      | 2   |       | 1   |      | 2   |       |
| Methotrexate                                                            | No           | 272 | 72.5  | 334 | 49.0 | 180 | 26.5  |
|                                                                         | Yes          | 103 | 27.5  | 348 | 51.0 | 499 | 73.5  |
|                                                                         | Unknown      | 5   |       | 10  |      | 3   |       |
| Splenectomy                                                             | No           | 353 | 93.1  | 677 | 98.0 | 682 | 100.0 |
|                                                                         | Yes          | 26  | 6.9   | 14  | 2.0  | 0   | 0.0   |
|                                                                         | Unknown      | 1   |       | 1   |      | 0   |       |
| <b><u>Ewing sarcoma</u></b>                                             |              |     |       |     |      |     |       |

|                                                                         |              |     |      |     |      |     |      |
|-------------------------------------------------------------------------|--------------|-----|------|-----|------|-----|------|
| Participants with treatment information                                 |              | 179 |      | 255 |      | 228 |      |
| Any RT max dose (Gy)                                                    | None         | 21  | 12.3 | 77  | 31.4 | 104 | 48.2 |
|                                                                         | >0-<40       | 13  | 7.6  | 33  | 13.5 | 22  | 10.2 |
|                                                                         | 40-<50       | 21  | 12.3 | 34  | 13.9 | 29  | 13.4 |
|                                                                         | ≥50          | 116 | 67.8 | 101 | 41.2 | 61  | 28.2 |
|                                                                         | Unknown      | 8   |      | 10  |      | 12  |      |
| Anthracycline, doxorubicin equivalent dose (mg/m <sup>2</sup> )         | None         | 45  | 28.1 | 11  | 4.7  | 1   | 0.5  |
|                                                                         | 1-<100       | 2   | 1.3  | 3   | 1.3  | 5   | 2.3  |
|                                                                         | 100-<250     | 11  | 6.9  | 18  | 7.7  | 26  | 12.0 |
|                                                                         | 250-<400     | 52  | 32.5 | 121 | 51.7 | 145 | 67.1 |
|                                                                         | ≥400         | 50  | 31.3 | 81  | 34.6 | 39  | 18.1 |
|                                                                         | Unknown      | 19  |      | 21  |      | 12  |      |
| Amputation surgery                                                      | None         | 109 | 60.9 | 154 | 60.4 | 152 | 66.7 |
|                                                                         | Limb-sparing | 50  | 27.9 | 67  | 26.3 | 55  | 24.1 |
|                                                                         | Amputation   | 20  | 11.2 | 34  | 13.3 | 21  | 9.2  |
| <b>Neuroblastoma</b>                                                    |              |     |      |     |      |     |      |
| Participants with treatment information                                 |              | 388 |      | 610 |      | 698 |      |
| Any RT max dose (Gy)                                                    | None         | 145 | 38.2 | 405 | 68.9 | 501 | 74.0 |
|                                                                         | >0-<20       | 88  | 23.2 | 86  | 14.6 | 58  | 8.6  |
|                                                                         | 20-<30       | 80  | 21.1 | 52  | 8.8  | 86  | 12.7 |
|                                                                         | 30-<40       | 50  | 13.2 | 25  | 4.3  | 24  | 3.6  |
|                                                                         | ≥40          | 17  | 4.5  | 20  | 3.4  | 8   | 1.2  |
|                                                                         | Unknown      | 8   |      | 22  |      | 21  |      |
| Alkylating agent, cyclophosphamide equivalent dose (mg/m <sup>2</sup> ) | None         | 149 | 44.5 | 259 | 45.3 | 262 | 41.3 |
|                                                                         | 1-<4000      | 23  | 6.9  | 50  | 8.7  | 92  | 14.5 |
|                                                                         | 4000-<8000   | 37  | 11.0 | 120 | 21.0 | 143 | 22.5 |
|                                                                         | 8000-<12000  | 27  | 8.1  | 60  | 10.5 | 32  | 5.0  |
|                                                                         | 12000-<16000 | 30  | 9.0  | 34  | 5.9  | 46  | 7.2  |
|                                                                         | 16000-<20000 | 24  | 7.2  | 19  | 3.3  | 25  | 3.9  |
|                                                                         | ≥20000       | 45  | 13.4 | 30  | 5.2  | 35  | 5.5  |
|                                                                         | Unknown      | 53  |      | 38  |      | 63  |      |
| Anthracycline, doxorubicin equivalent dose (mg/m <sup>2</sup> )         | None         | 321 | 85.2 | 362 | 61.4 | 302 | 45.2 |
|                                                                         | 1-<150       | 9   | 2.4  | 82  | 13.9 | 201 | 30.1 |
|                                                                         | 150-<300     | 14  | 3.7  | 115 | 19.5 | 143 | 21.4 |
|                                                                         | ≥300         | 33  | 8.8  | 31  | 5.3  | 22  | 3.3  |
|                                                                         | Unknown      | 11  |      | 20  |      | 30  |      |
| Platinum (mg/m <sup>2</sup> )                                           | None         | 370 | 97.1 | 436 | 74.3 | 328 | 49.9 |
|                                                                         | 1-<400       | 7   | 1.8  | 62  | 10.6 | 75  | 11.4 |
|                                                                         | ≥400         | 4   | 1.1  | 89  | 15.2 | 254 | 38.7 |
|                                                                         | Unknown      | 7   |      | 23  |      | 41  |      |
| Epipodophyllotoxin (mg/m <sup>2</sup> )                                 | None         | 370 | 96.9 | 456 | 77.2 | 330 | 50.5 |
|                                                                         | 1-<1000      | 5   | 1.3  | 67  | 11.3 | 76  | 11.6 |
|                                                                         | ≥1000        | 7   | 1.8  | 68  | 11.5 | 247 | 37.8 |
|                                                                         | Unknown      | 6   |      | 19  |      | 45  |      |
| <b>Medulloblastoma/PNET</b>                                             |              |     |      |     |      |     |      |
| Participants with treatment information                                 |              | 135 |      | 322 |      | 482 |      |
| Cranial RT max dose (Gy)                                                | None         | 3   | 2.3  | 12  | 4.0  | 39  | 8.5  |
|                                                                         | >0-<50       | 54  | 42.2 | 71  | 23.5 | 34  | 7.4  |
|                                                                         | ≥50          | 71  | 55.5 | 219 | 72.5 | 386 | 84.1 |
|                                                                         | Unknown      | 7   |      | 20  |      | 23  |      |
| Alkylating agent, cyclophosphamide equivalent dose (mg/m <sup>2</sup> ) | None         | 77  | 64.7 | 132 | 45.8 | 68  | 15.2 |
|                                                                         | 1-<4000      | 4   | 3.4  | 26  | 9.0  | 23  | 5.1  |
|                                                                         | 4000-<8000   | 8   | 6.7  | 17  | 5.9  | 64  | 14.3 |
|                                                                         | 8000-<12000  | 12  | 10.1 | 45  | 15.6 | 146 | 32.6 |
|                                                                         | 12000-<16000 | 11  | 9.2  | 47  | 16.3 | 61  | 13.6 |
|                                                                         | 16000-<20000 | 5   | 4.2  | 9   | 3.1  | 46  | 10.3 |
|                                                                         | ≥20000       | 2   | 1.7  | 12  | 4.2  | 40  | 8.9  |
|                                                                         | Unknown      | 16  |      | 34  |      | 34  |      |
| Platinum (mg/m <sup>2</sup> )                                           | None         | 132 | 99.3 | 187 | 60.5 | 83  | 18.3 |
|                                                                         | 1-<400       | 0   | 0.0  | 59  | 19.1 | 153 | 33.7 |
|                                                                         | ≥400         | 1   | 0.8  | 63  | 20.4 | 218 | 48.0 |
|                                                                         | Unknown      | 2   |      | 13  |      | 28  |      |
| Vincristine                                                             | No           | 76  | 63.3 | 127 | 41.8 | 73  | 15.3 |
|                                                                         | Yes          | 44  | 36.7 | 177 | 58.2 | 404 | 84.7 |
|                                                                         | Unknown      | 15  |      | 18  |      | 5   |      |
| <b>Acute myeloid leukemia</b>                                           |              |     |      |     |      |     |      |
| Participants with treatment information                                 |              | 114 |      | 314 |      | 394 |      |

|                                                                         |                                                                 |      |      |      |      |      |      |
|-------------------------------------------------------------------------|-----------------------------------------------------------------|------|------|------|------|------|------|
| Any RT max dose (Gy)                                                    | None                                                            | 62   | 56.4 | 179  | 61.5 | 293  | 75.3 |
|                                                                         | >0-<20                                                          | 18   | 16.4 | 85   | 29.2 | 84   | 21.6 |
|                                                                         | ≥20                                                             | 30   | 27.3 | 27   | 9.3  | 12   | 3.1  |
|                                                                         | Unknown                                                         | 4    |      | 23   |      | 5    |      |
| Alkylating agent, cyclophosphamide equivalent dose (mg/m <sup>2</sup> ) | None                                                            | 38   | 39.6 | 111  | 38.3 | 190  | 50.9 |
|                                                                         | 1-<4000                                                         | 14   | 14.6 | 85   | 29.3 | 90   | 24.1 |
|                                                                         | 4000-<8000                                                      | 24   | 25.0 | 59   | 20.3 | 29   | 7.8  |
|                                                                         | 8000-<12000                                                     | 7    | 7.3  | 17   | 5.9  | 39   | 10.5 |
|                                                                         | ≥12000                                                          | 13   | 13.5 | 18   | 6.2  | 25   | 6.7  |
|                                                                         | Unknown                                                         | 18   |      | 24   |      | 21   |      |
| Anthracycline, doxorubicin equivalent dose (mg/m <sup>2</sup> )         | None                                                            | 29   | 28.2 | 16   | 5.5  | 14   | 3.6  |
|                                                                         | 1-<300                                                          | 23   | 22.3 | 150  | 51.4 | 265  | 68.8 |
|                                                                         | 300-<450                                                        | 22   | 21.4 | 95   | 32.5 | 95   | 24.7 |
|                                                                         | ≥450                                                            | 29   | 28.2 | 31   | 10.6 | 11   | 2.9  |
|                                                                         | Unknown                                                         | 11   |      | 22   |      | 9    |      |
| Epipodophyllotoxin (mg/m <sup>2</sup> )                                 | None                                                            | 105  | 92.1 | 118  | 39.5 | 60   | 15.8 |
|                                                                         | 1-<1000                                                         | 0    | 0.0  | 77   | 25.8 | 129  | 34.0 |
|                                                                         | 1000-<4000                                                      | 3    | 2.6  | 66   | 22.1 | 176  | 46.4 |
|                                                                         | ≥4000                                                           | 6    | 5.3  | 38   | 12.7 | 14   | 3.7  |
|                                                                         | Unknown                                                         | 0    |      | 15   |      | 15   |      |
| Dexamethasone                                                           | No                                                              | 108  | 98.2 | 196  | 63.8 | 194  | 49.5 |
|                                                                         | Yes                                                             | 2    | 1.8  | 111  | 36.2 | 198  | 50.5 |
|                                                                         | Unknown                                                         | 4    |      | 7    |      | 2    |      |
| <b><u>Soft tissue sarcoma</u></b>                                       |                                                                 |      |      |      |      |      |      |
| Participants with treatment information                                 |                                                                 | 323  |      | 412  |      | 338  |      |
| Any RT max dose (Gy)                                                    | None                                                            | 59   | 19.4 | 96   | 24.3 | 96   | 30.0 |
|                                                                         | >0-<40                                                          | 32   | 10.5 | 38   | 9.6  | 24   | 7.5  |
|                                                                         | 40-<50                                                          | 80   | 26.3 | 146  | 37.0 | 77   | 24.1 |
|                                                                         | ≥50                                                             | 133  | 43.8 | 115  | 29.1 | 123  | 38.4 |
|                                                                         | Unknown                                                         | 19   |      | 17   |      | 18   |      |
| Alkylating agent, cyclophosphamide equivalent dose (mg/m <sup>2</sup> ) | None                                                            | 37   | 13.8 | 74   | 19.5 | 57   | 17.8 |
|                                                                         | 1-<8000                                                         | 42   | 15.7 | 47   | 12.4 | 21   | 6.5  |
|                                                                         | 8000-<12000                                                     | 36   | 13.4 | 64   | 16.9 | 29   | 9.0  |
|                                                                         | 12000-<16000                                                    | 30   | 11.2 | 70   | 18.5 | 21   | 6.5  |
|                                                                         | 16000-<20000                                                    | 39   | 14.6 | 69   | 18.2 | 20   | 6.2  |
|                                                                         | ≥20000                                                          | 84   | 31.3 | 55   | 14.5 | 173  | 53.9 |
|                                                                         | Unknown                                                         | 55   |      | 33   |      | 17   |      |
| Anthracycline, doxorubicin equivalent dose (mg/m <sup>2</sup> )         | None                                                            | 193  | 62.3 | 173  | 43.5 | 230  | 69.3 |
|                                                                         | 1-<300                                                          | 55   | 17.7 | 62   | 15.6 | 57   | 17.2 |
|                                                                         | 300-<450                                                        | 34   | 11.0 | 126  | 31.7 | 33   | 9.9  |
|                                                                         | ≥450                                                            | 28   | 9.0  | 37   | 9.3  | 12   | 3.6  |
|                                                                         | Unknown                                                         | 13   |      | 14   |      | 6    |      |
| <b><u>Osteosarcoma</u></b>                                              |                                                                 |      |      |      |      |      |      |
| Participants with treatment information                                 |                                                                 | 314  |      | 425  |      | 360  |      |
| Alkylating agent, cyclophosphamide equivalent dose (mg/m <sup>2</sup> ) | None                                                            | 163  | 56.2 | 126  | 32.2 | 104  | 30.3 |
|                                                                         | 1-<4000                                                         | 22   | 7.6  | 71   | 18.2 | 42   | 12.2 |
|                                                                         | 4000-<8000                                                      | 82   | 28.3 | 160  | 40.9 | 39   | 11.4 |
|                                                                         | 8000-<12000                                                     | 15   | 5.2  | 20   | 5.1  | 82   | 23.9 |
|                                                                         | 12000-<16000                                                    | 5    | 1.7  | 2    | 0.5  | 49   | 14.3 |
|                                                                         | ≥16000                                                          | 3    | 1.0  | 12   | 3.1  | 27   | 7.9  |
|                                                                         | Unknown                                                         | 24   |      | 34   |      | 17   |      |
|                                                                         | Anthracycline, doxorubicin equivalent dose (mg/m <sup>2</sup> ) | None | 56   | 20.1 | 51   | 13.1 | 20   |
| 1-<300                                                                  |                                                                 | 53   | 19.0 | 100  | 25.7 | 66   | 19.1 |
| 300-<450                                                                |                                                                 | 90   | 32.3 | 165  | 42.4 | 197  | 56.9 |
| ≥450                                                                    |                                                                 | 80   | 28.7 | 73   | 18.8 | 63   | 18.2 |
| Unknown                                                                 |                                                                 | 35   |      | 36   |      | 14   |      |
| Platinum (mg/m <sup>2</sup> )                                           | None                                                            | 273  | 88.6 | 138  | 34.9 | 52   | 15.0 |
|                                                                         | 1-<400                                                          | 13   | 4.2  | 67   | 17.0 | 100  | 28.8 |
|                                                                         | ≥400                                                            | 22   | 7.1  | 190  | 48.1 | 195  | 56.2 |
|                                                                         | Unknown                                                         | 6    |      | 30   |      | 13   |      |
| Methotrexate, IV (mg/m <sup>2</sup> )                                   | None                                                            | 94   | 32.9 | 91   | 22.9 | 57   | 16.5 |
|                                                                         | 1-<12000                                                        | 45   | 15.7 | 59   | 14.8 | 61   | 17.6 |
|                                                                         | ≥12000                                                          | 147  | 51.4 | 248  | 62.3 | 228  | 65.9 |
|                                                                         | Unknown                                                         | 28   |      | 27   |      | 14   |      |

RT: radiation therapy; Gy: Gray; PNET: primitive neuroectodermal tumor; IV: intravenous administration  
Percentages are among those with known values

**Appendix Table 5. Cumulative incidence of grade 3-5 chronic health conditions among siblings, with siblings stratified based on the diagnosis decade of their related survivor**

| Era                  | Time Period Post-Diagnosis |                                 |           |                                 |           |                                 |           |                                 |
|----------------------|----------------------------|---------------------------------|-----------|---------------------------------|-----------|---------------------------------|-----------|---------------------------------|
|                      | 5 years                    |                                 | 10 years  |                                 | 15 years  |                                 | 20 years  |                                 |
|                      | # at risk                  | Cumulative incidence (95% C.I.) | # at risk | Cumulative incidence (95% C.I.) | # at risk | Cumulative incidence (95% C.I.) | # at risk | Cumulative incidence (95% C.I.) |
| 1970-79              | 1757                       | 0.1 (0.0- 0.3)                  | 1720      | 2.2 ( 1.5- 2.9)                 | 1679      | 3.6 ( 2.8- 4.5)                 | 1582      | 5.5 ( 4.5- 6.6)                 |
| 1980-89              | 2366                       | 0.3 ( 0.1- 0.5)                 | 2298      | 1.1 ( 0.7- 1.5)                 | 2094      | 2.0 ( 1.4- 2.6)                 | 1606      | 3.5 ( 2.7- 4.3)                 |
| 1990-99 <sup>1</sup> | 782                        | 0.0 ( 0.0- 0.0)                 | 754       | 1.2 ( 0.4- 2.0)                 | 582       | 2.9 ( 1.7- 4.2)                 | 302       | 6.0 ( 4.0- 8.0)                 |

<sup>1</sup> When the CCSS cohort was expanded to include survivors diagnosed from 1987-1999, due to cost restraints, a smaller group of siblings was recruited compared to the original cohort (survivors diagnosed 1970-1986). This accounts for the smaller numbers of siblings at risk in the 1990-99 group.

**Appendix Table 6. Cumulative incidence of grade 3-5 chronic health conditions by cancer diagnosis at 15 years after primary cancer diagnosis among 5-year survivors**

| Cancer Diagnosis             | Cumulative Incidence at 15 Years Post-Diagnosis (95% CI) |                  |                  | P-Values        |                 |                 |
|------------------------------|----------------------------------------------------------|------------------|------------------|-----------------|-----------------|-----------------|
|                              | 1970-1979                                                | 1980-1989        | 1990-1999        | 1980s vs. 1970s | 1990s vs. 1970s | 1990s vs. 1980s |
| Acute lymphoblastic leukemia | 15.7 (14.1-17.4)                                         | 14.5 (13.3-15.6) | 14.6 (13.5-15.8) | 0.22            | 0.28            | 0.84            |
| Acute myeloid leukemia       | 19.1 (12.4-25.8)                                         | 26.9 (22.0-31.7) | 25.7 (21.3-30.2) | 0.065           | 0.11            | 0.74            |
| Astrocytoma                  | 47.3 (42.9-51.7)                                         | 41.0 (37.9-44.2) | 30.5 (27.8-33.2) | 0.022           | <0.0001         | <0.0001         |
| Medulloblastoma/PNET         | 42.9 (34.9-50.9)                                         | 50.4 (45.1-55.7) | 58.9 (54.4-63.3) | 0.12            | 0.00060         | 0.016           |
| Hodgkin lymphoma             | 26.4 (23.8-29.1)                                         | 22.1 (19.6-24.7) | 17.7 (15.0-20.5) | 0.021           | <0.0001         | 0.021           |
| Non-Hodgkin lymphoma         | 23.8 (19.9-27.7)                                         | 23.1 (20.1-26.1) | 16.9 (14.0-19.7) | 0.79            | 0.0053          | 0.0031          |
| Wilms tumor                  | 17.6 (14.3-20.8)                                         | 15.5 (13.1-18.0) | 11.9 (9.5-14.3)  | 0.32            | 0.034           | 0.0055          |
| Neuroblastoma                | 18.0 (14.5-21.6)                                         | 22.7 (19.5-25.9) | 25.0 (21.8-28.2) | 0.056           | 0.0045          | 0.32            |
| Soft tissue sarcoma          | 36.5 (31.5-41.4)                                         | 36.9 (32.4-41.4) | 28.3 (23.5-33.1) | 0.90            | 0.021           | 0.011           |
| Ewing sarcoma                | 30.6 (24.3-37.0)                                         | 35.6 (29.9-41.3) | 29.0 (23.0-35.0) | 0.25            | 0.71            | 0.12            |
| Osteosarcoma                 | 87.5 (84.1-91.0)                                         | 75.7 (71.8-79.6) | 65.6 (60.6-70.6) | <0.0001         | <0.0001         | 0.0017          |

**Appendix Table 7. Cumulative incidence of grade 3-5 chronic health conditions by cancer diagnosis at 15 years after primary cancer diagnosis among 5-year survivors.**

| Cancer Diagnosis             | Cumulative Incidence (%) at 15 Years Post-Diagnosis (95% CI) |                  |                  |                  |                  |                  |
|------------------------------|--------------------------------------------------------------|------------------|------------------|------------------|------------------|------------------|
|                              | 1970-1974                                                    | 1975-1979        | 1980-1984        | 1985-1989        | 1990-1994        | 1995-1999        |
| Acute lymphoblastic leukemia | 14.6 (12.0-17.3)                                             | 16.4 (14.3-18.6) | 15.1 (13.4-16.8) | 13.9 (12.3-15.5) | 12.3 (10.8-13.7) | 16.9 (15.2-18.6) |
| Acute myeloid leukemia       | 12.1 (1.0-23.3)                                              | 21.9 (13.7-30.1) | 28.4 (21.0-35.9) | 25.7 (19.4-32.0) | 23.5 (17.3-29.6) | 27.5 (21.1-33.8) |
| Astrocytoma                  | 46.1 (39.2-52.9)                                             | 48.3 (42.7-54.0) | 39.2 (34.6-43.8) | 42.7 (38.3-47.0) | 30.9 (27.0-34.7) | 30.4 (26.4-34.5) |
| Medulloblastoma/PNET         | 38.6 (24.2-53.0)                                             | 44.7 (35.2-54.3) | 47.0 (39.2-54.9) | 53.2 (46.1-60.3) | 55.1 (48.6-61.6) | 63.1 (56.6-69.5) |
| Hodgkin lymphoma             | 24.7 (20.9-28.4)                                             | 28.0 (24.4-31.7) | 23.8 (20.4-27.3) | 20.0 (16.3-23.7) | 18.3 (14.5-22.2) | 17.5 (13.4-21.7) |
| Non-Hodgkin lymphoma         | 28.0 (20.1-35.8)                                             | 22.2 (17.7-26.7) | 21.1 (17.2-25.1) | 25.4 (20.9-30.0) | 13.7 (10.0-17.4) | 20.1 (15.6-24.6) |
| Wilms tumor                  | 18.3 (12.9-23.7)                                             | 17.3 (13.2-21.3) | 14.7 (11.6-17.8) | 16.7 (12.9-20.5) | 10.0 (7.0-13.0)  | 14.4 (10.4-18.3) |
| Neuroblastoma                | 19.9 (14.0-25.9)                                             | 17.0 (12.6-21.5) | 20.0 (15.8-24.2) | 25.8 (20.9-30.6) | 22.6 (18.0-27.2) | 27.2 (22.6-31.9) |
| Soft tissue sarcoma          | 40.6 (32.8-48.3)                                             | 33.6 (27.3-40.0) | 35.8 (29.4-42.1) | 38.1 (31.7-44.5) | 28.5 (21.8-35.3) | 28.1 (21.2-35.0) |
| Ewing sarcoma                | 25.4 (14.1-36.7)                                             | 32.9 (25.3-40.5) | 39.0 (31.1-47.0) | 31.9 (23.8-40.1) | 31.5 (22.0-41.0) | 28.2 (19.8-36.6) |
| Osteosarcoma                 | 88.8 (82.8-94.8)                                             | 87.0 (82.8-91.2) | 78.9 (73.9-83.8) | 71.6 (65.4-77.8) | 64.0 (56.6-71.3) | 68.4 (60.9-75.8) |



**Appendix Table 8. Cumulative incidence of two or more grade 3-5 chronic health conditions by cancer diagnosis at 15 years after primary cancer diagnosis among 5-year survivors**

| Cancer Diagnosis             | Cumulative Incidence at 15 Years Post-Diagnosis (95% CI) |                  |                  | P-Values        |                 |                 |
|------------------------------|----------------------------------------------------------|------------------|------------------|-----------------|-----------------|-----------------|
|                              | 1970-1979                                                | 1980-1989        | 1990-1999        | 1980s vs. 1970s | 1990s vs. 1970s | 1990s vs. 1980s |
| Acute lymphoblastic leukemia | 4.3 (3.4-5.2)                                            | 3.6 (3.0-4.2)    | 3.2 (2.7-3.8)    | 0.23            | 0.060           | 0.39            |
| Acute myeloid leukemia       | 5.0 (1.2-8.7)                                            | 12.1 (8.6-15.6)  | 7.7 (5.0-10.4)   | 0.0064          | 0.25            | 0.051           |
| Astrocytoma                  | 17.2 (13.9-20.5)                                         | 16.0 (13.7-18.4) | 9.2 (7.4-10.9)   | 0.57            | <0.0001         | <0.0001         |
| Medulloblastoma/PNET         | 16.2 (10.3-22.2)                                         | 22.1 (17.7-26.5) | 25.0 (21.1-28.9) | 0.12            | 0.015           | 0.34            |
| Hodgkin lymphoma             | 5.1 (3.8-6.4)                                            | 5.0 (3.7-6.3)    | 4.0 (2.6-5.4)    | 0.89            | 0.25            | 0.31            |
| Non-Hodgkin lymphoma         | 3.5 (1.8-5.1)                                            | 5.3 (3.7-6.9)    | 4.5 (2.9-6.1)    | 0.11            | 0.39            | 0.46            |
| Wilms tumor                  | 3.7 (2.1-5.3)                                            | 2.8 (1.7-3.9)    | 1.9 (0.9-2.9)    | 0.35            | 0.062           | 0.25            |
| Neuroblastoma                | 3.5 (1.8-5.2)                                            | 6.6 (4.7-8.5)    | 5.3 (3.6-7.0)    | 0.016           | 0.15            | 0.30            |
| Soft tissue sarcoma          | 10.8 (7.7-14.0)                                          | 11.9 (8.9-14.9)  | 6.3 (3.6-9.0)    | 0.64            | 0.031           | 0.0063          |
| Ewing sarcoma                | 9.5 (5.5-13.6)                                           | 10.0 (6.4-13.6)  | 9.0 (5.1-12.9)   | 0.86            | 0.85            | 0.70            |
| Osteosarcoma                 | 14.1 (10.5-17.7)                                         | 19.9 (16.3-23.6) | 19.2 (15.1-23.3) | 0.024           | 0.066           | 0.79            |

**Appendix Table 9. Results of multivariable regression models with and without treatment variables, by diagnosis group.** The specific treatment variables included for each diagnosis-specific model are listed in Appendix Tables 12 and 13 (pp. 29-32)

| Diagnosis                    | Prevalent Conditions at 5 Years Post-Diagnosis |                              | Incident Conditions 5-15 Years Post-Diagnosis |                              |
|------------------------------|------------------------------------------------|------------------------------|-----------------------------------------------|------------------------------|
|                              | Model Unadjusted for Treatment                 | Model Adjusted for Treatment | Model Unadjusted for Treatment                | Model Adjusted for Treatment |
|                              | PR (95% CI)                                    | PR (95% CI)                  | HR (95% CI)                                   | HR (95% CI)                  |
| Acute lymphoblastic leukemia | 1.05 (0.93-1.17)                               | 1.14 (0.95-1.36)             | 0.85 (0.77-0.95)                              | 0.93 (0.79-1.10)             |
| Acute myeloid leukemia       | 1.14 (0.92-1.41)                               | 1.09 (0.81-1.48)             | 0.87 (0.64-1.18)                              | 0.72 (0.43-1.20)             |
| Hodgkin lymphoma             | 0.87 (0.76-1.00)                               | 1.11 (0.88-1.40)             | 0.75 (0.65-0.85)                              | 0.91 (0.73-1.12)             |
| Non-Hodgkin lymphoma         | 0.85 (0.75-0.97)                               | 0.75 (0.60-0.94)             | 0.79 (0.63-0.99)                              | 0.96 (0.66-1.39)             |
| Astrocytoma                  | 0.84 (0.78-0.89)                               | 0.88 (0.81-0.95)             | 0.77 (0.64-0.92)                              | 0.89 (0.72-1.11)             |
| Medulloblastoma/PNET         | 1.20 (1.08-1.32)                               | 1.13 (0.98-1.31)             | 1.14 (0.89-1.47)                              | 1.30 (0.91-1.84)             |
| Wilms tumor                  | 1.18 (1.00-1.40)                               | 1.38 (1.09-1.74)             | 0.57 (0.46-0.70)                              | 0.62 (0.44-0.86)             |
| Neuroblastoma                | 1.30 (1.16-1.44)                               | 0.93 (0.79-1.09)             | 1.01 (0.80-1.26)                              | 0.83 (0.57-1.21)             |
| Ewing sarcoma                | 1.17 (0.99-1.39)                               | 1.09 (0.88-1.35)             | 0.69 (0.52-0.91)                              | 0.82 (0.56-1.21)             |
| Osteosarcoma                 | 0.87 (0.84-0.90)                               | 0.85 (0.80-0.91)             | 0.96 (0.69-1.34)                              | 0.83 (0.54-1.29)             |
| Soft tissue sarcoma          | 0.89 (0.79-1.00)                               | 0.95 (0.84-1.08)             | 0.96 (0.76-1.23)                              | 0.98 (0.73-1.32)             |

Note: all models were adjusted for sex and attained age (cubic spline)

**Appendix Table 10. Statistical evaluation of treatment variables as a mediator of the association between diagnosis decade and rates of grade 3-5 chronic conditions**

| <b>Diagnosis</b>             | <b>p-value</b> |
|------------------------------|----------------|
| Hodgkin lymphoma             | 0.024          |
| Non-Hodgkin lymphoma         | 0.088          |
| Wilms tumor                  | 0.27           |
| Acute lymphoblastic leukemia | 0.21           |
| Astrocytoma                  | 0.0085         |

The difference in regression coefficients for diagnosis decade from models with and without relevant treatment variables (potential mediator) included was evaluated based on 1000 bootstrap samples, with a null hypothesis of no difference or positive change. P-value is based on the proportion of samples with a negative change between coefficients (with – without), indicating significant attenuation.

**Appendix Table 11. Prevalence ratio or hazard ratio per decade of grade 3-5 chronic health conditions by organ system at 15 years after primary cancer diagnosis among 5-year survivors.** Prevalence ratio models examined conditions prevalent at study entry among 5-year survivors. Hazard ratios examined conditions that occurred 5-15 years post-diagnosis.

| Chronic Conditions by Organ System        | Per Decade                | Per Decade            |
|-------------------------------------------|---------------------------|-----------------------|
|                                           | Prevalence Ratio (95% CI) | Hazard Ratio (95% CI) |
| <b>Endocrine</b>                          | 0.82 (0.72-0.93)          | 0.61 (0.55-0.68)      |
| Thyroid nodules requiring surgery         | 0.63 (0.49-0.81)          | 0.70 (0.59-0.83)      |
| Gonadal dysfunction                       | 0.74 (0.62-0.89)          | 0.38 (0.32-0.45)      |
| Diabetes mellitus requiring insulin       | 1.59 (1.09-2.34)          | 1.53 (1.16-2.01)      |
| <b>2<sup>nd</sup> Malignant Neoplasms</b> | 1.20 (0.85-1.68)          | 0.82 (0.73-0.92)      |
| <b>Cardiovascular</b>                     | 1.05 (0.95-1.16)          | 0.93 (0.85-1.03)      |
| Congestive heart failure                  | 0.72 (0.54-0.96)          | 1.03 (0.84-1.25)      |
| Myocardial infarction                     | 0.88 (0.56-1.39)          | 0.85 (0.64-1.12)      |
| Stroke                                    | 1.15 (0.99-1.34)          | 0.95 (0.80-1.12)      |
| Thromboembolic disease                    | 0.99 (0.84-1.17)          | 0.89 (0.76-1.04)      |
| <b>Neurological</b>                       | 0.97 (0.90-1.05)          | 0.79 (0.68-0.92)      |
| Memory problems                           | 1.18 (1.06-1.32)          | 1.14 (0.87-1.49)      |
| Balance problems                          | 1.28 (1.08-1.52)          | 1.34 (0.91-1.99)      |
| Paralysis                                 | 0.43 (0.38-0.49)          | 0.42 (0.33-0.54)      |
| <b>Hearing Loss</b>                       | 1.37 (1.25-1.50)          | 1.19 (1.04-1.36)      |
| <b>Visual impairment</b>                  | 0.91 (0.84-0.99)          | 1.10 (0.95-1.27)      |
| Cataracts requiring surgery               | 1.24 (0.98-1.57)          | 1.21 (0.98-1.49)      |
| Blindness                                 | 0.86 (0.79-0.94)          | 1.00 (0.84-1.19)      |
| <b>Gastrointestinal</b>                   | 0.84 (0.72-0.97)          | 0.72 (0.60-0.88)      |
| Intestinal obstruction                    | 0.76 (0.65-0.87)          | 0.66 (0.53-0.83)      |
| Hepatitis                                 | 1.51 (0.95-2.39)          | 0.80 (0.54-1.17)      |
| <b>Musculoskeletal</b>                    | 0.69 (0.64-0.75)          | 1.13 (0.95-1.35)      |
| Amputation                                | 0.47 (0.43-0.52)          | 0.80 (0.60-1.06)      |
| Major joint replacement                   | 1.67 (1.44-1.95)          | 1.47 (1.18-1.82)      |
| <b>Respiratory</b>                        | 1.42 (1.01-2.00)          | 0.89 (0.68-1.17)      |
| Pulmonary fibrosis                        | 2.28 (1.50-3.46)          | 1.30 (0.87-1.96)      |
| <b>Renal</b>                              | 1.42 (1.13-1.79)          | 1.01 (0.78-1.31)      |
| Dialysis                                  | 1.48 (1.16-1.88)          | 0.98 (0.76-1.28)      |

**Appendix Table 12. Hazard ratios for association between diagnosis decade and grade 3-5 chronic health conditions among 5-year survivors of childhood cancer and the impact of adding specific treatment exposures to multivariable Cox regression models.**

|                                                                         |                     | Model without treatment variables | Model with treatment variables |
|-------------------------------------------------------------------------|---------------------|-----------------------------------|--------------------------------|
|                                                                         |                     | HR (95% CI)                       | HR (95% CI)                    |
| <b><u>Acute lymphoblastic leukemia</u></b>                              |                     |                                   |                                |
| <b>Diagnosis decade</b>                                                 | <b>Per 10 years</b> | <b>0.85 (0.77-0.95)</b>           | <b>0.93 (0.79-1.10)</b>        |
| Cranial RT max dose (Gy)                                                | None                |                                   | 1.00 (reference)               |
|                                                                         | >0 - <20            |                                   | 2.19 (1.74-2.74)               |
|                                                                         | ≥20                 |                                   | 2.96 (2.29-3.83)               |
| Anthracycline, doxorubicin equivalent dose (mg/m <sup>2</sup> )         | None                |                                   | 1.00 (reference)               |
|                                                                         | 1-<150              |                                   | 1.02 (0.77-1.36)               |
|                                                                         | 150-<300            |                                   | 1.00 (0.74-1.36)               |
|                                                                         | 300-<450            |                                   | 1.20 (0.86-1.69)               |
|                                                                         | 450-<600            |                                   | 1.31 (0.77-2.23)               |
|                                                                         | ≥600                |                                   | 2.00 (0.92-4.34)               |
| Epipodophyllotoxin (mg/m <sup>2</sup> )                                 | None                |                                   | 1.00 (reference)               |
|                                                                         | 1-<1000             |                                   | 2.25 (1.56-3.24)               |
|                                                                         | 1000-<4000          |                                   | 1.42 (1.04-1.95)               |
|                                                                         | ≥4000               |                                   | 1.68 (1.24-2.26)               |
| Methotrexate                                                            | No                  |                                   | 1.00 (reference)               |
|                                                                         | Yes                 |                                   | 1.18 (0.95-1.46)               |
| Steroids                                                                | None                |                                   | 1.00 (reference)               |
|                                                                         | Prednisone only     |                                   | 0.38 (0.27-0.54)               |
|                                                                         | Dexamethasone only  |                                   | 0.50 (0.28-0.91)               |
|                                                                         | Both                |                                   | 0.56 (0.39-0.80)               |
| <b><u>Hodgkin lymphoma</u></b>                                          |                     |                                   |                                |
| <b>Diagnosis decade</b>                                                 | <b>Per 10 years</b> | <b>0.75 (0.65-0.85)</b>           | <b>0.91 (0.73-1.12)</b>        |
| Any RT max dose (Gy)                                                    | None                |                                   | 1.00 (reference)               |
|                                                                         | >0-<20              |                                   | 0.87 (0.20-3.84)               |
|                                                                         | 20-<30              |                                   | 2.71 (1.52-4.84)               |
|                                                                         | 30-<40              |                                   | 3.27 (1.78-6.00)               |
|                                                                         | 40-<50              |                                   | 3.33 (1.76-6.30)               |
|                                                                         | ≥50                 |                                   | 3.60 (1.49-8.69)               |
| Alkylating agent, cyclophosphamide equivalent dose (mg/m <sup>2</sup> ) | None                |                                   | 1.00 (reference)               |
|                                                                         | 1-<4000             |                                   | 0.86 (0.41-1.79)               |
|                                                                         | 4000-<8000          |                                   | 1.33 (0.91-1.94)               |
|                                                                         | 8000-<12000         |                                   | 1.24 (0.87-1.78)               |
|                                                                         | 12000-<16000        |                                   | 1.26 (0.83-1.91)               |
|                                                                         | 16000-<20000        |                                   | 1.48 (0.71-3.08)               |
| Anthracycline, doxorubicin equivalent dose (mg/m <sup>2</sup> )         | None                |                                   | 1.00 (reference)               |
|                                                                         | 1-<150              |                                   | 0.85 (0.45-1.61)               |
|                                                                         | 150-<300            |                                   | 1.12 (0.67-1.88)               |
|                                                                         | ≥300                |                                   | 1.06 (0.55-2.03)               |
| Platinum (mg/m <sup>2</sup> )                                           | None                |                                   | 1.00 (reference)               |
|                                                                         | 1-<400              |                                   | 2.12 (0.83-5.43)               |
|                                                                         | ≥400                |                                   | 1.13 (0.34-3.75)               |
| Bleomycin                                                               | No                  |                                   | 1.00 (reference)               |
|                                                                         | Yes                 |                                   | 1.22 (0.81-1.84)               |
| Splenectomy                                                             | No                  |                                   | 1.00 (reference)               |
|                                                                         | Yes                 |                                   | 1.20 (0.89-1.62)               |
| <b><u>Astrocytoma</u></b>                                               |                     |                                   |                                |
| <b>Diagnosis decade</b>                                                 | <b>Per 10 years</b> | <b>0.77 (0.64-0.92)</b>           | <b>0.89 (0.72-1.11)</b>        |
| Cranial RT max dose (Gy)                                                | None                |                                   | 1.00 (reference)               |
|                                                                         | >0-<50              |                                   | 1.91 (1.08-3.37)               |
|                                                                         | 50-<60              |                                   | 2.75 (1.91-3.95)               |
|                                                                         | ≥60                 |                                   | 3.71 (2.08-6.64)               |
| Alkylating agents                                                       | No                  |                                   | 1.00 (reference)               |
|                                                                         | Yes                 |                                   | 1.82 (1.21-2.75)               |
| Platinum                                                                | No                  |                                   | 1.00 (reference)               |
|                                                                         | Yes                 |                                   | 1.65 (1.01-2.70)               |

**Wilms tumor**

| <b>Diagnosis decade</b>                                         | <b>Per 10 years</b> | <b>0·57 (0·46-0·70)</b> | <b>0·62 (0·44-0·86)</b> |
|-----------------------------------------------------------------|---------------------|-------------------------|-------------------------|
| Abdomen/pelvis RT max dose (Gy)                                 | None                |                         | 1·00 (reference)        |
|                                                                 | >0-<20              |                         | 1·28 (0·68-2·41)        |
|                                                                 | 20-<30              |                         | 1·99 (1·11-3·54)        |
|                                                                 | 30-<40              |                         | 2·24 (1·13-4·42)        |
|                                                                 | ≥40                 |                         | 2·23 (0·72-6·95)        |
| Anthracycline, doxorubicin equivalent dose (mg/m <sup>2</sup> ) | None                |                         | 1·00 (reference)        |
|                                                                 | 1-<150              |                         | 1·48 (0·70-3·14)        |
|                                                                 | 150-<300            |                         | 0·94 (0·55-1·60)        |
| Platinum                                                        | ≥300                |                         | 1·90 (1·11-3·27)        |
|                                                                 | No                  |                         | 1·00 (reference)        |
| Vincristine                                                     | Yes                 |                         | 3·31 (1·50-7·31)        |
|                                                                 | No                  |                         | 1·00 (reference)        |
| Splenectomy                                                     | Yes                 |                         | 1·22 (0·55-2·67)        |
|                                                                 | No                  |                         | 1·00 (reference)        |
|                                                                 | Yes                 |                         | 1·96 (0·71-5·39)        |

### Non-Hodgkin lymphoma

| <b>Diagnosis decade</b>                                                 | <b>Per 10 years</b> | <b>0·79 (0·63-0·99)</b> | <b>0·96 (0·66-1·39)</b> |
|-------------------------------------------------------------------------|---------------------|-------------------------|-------------------------|
| Any RT max dose (Gy)                                                    | None                |                         | 1·00 (reference)        |
|                                                                         | >0-<20              |                         | 1·02 (0·47-2·22)        |
|                                                                         | 20-<30              |                         | 1·41 (0·76-2·63)        |
|                                                                         | 30-<40              |                         | 2·51 (1·36-4·63)        |
|                                                                         | 40-<50              |                         | 2·56 (1·13-5·82)        |
|                                                                         | ≥50                 |                         | 1·04 (0·14-8·01)        |
| Alkylating agent, cyclophosphamide equivalent dose (mg/m <sup>2</sup> ) | None                |                         | 1·00 (reference)        |
|                                                                         | 1-<4000             |                         | 1·25 (0·53-2·93)        |
|                                                                         | 4000-<8000          |                         | 1·36 (0·63-2·97)        |
|                                                                         | 8000-<12000         |                         | 1·22 (0·54-2·76)        |
|                                                                         | 12000-<16000        |                         | 0·82 (0·28-2·38)        |
|                                                                         | 16000-<20000        |                         | 1·49 (0·52-4·25)        |
| Anthracycline, doxorubicin equivalent dose (mg/m <sup>2</sup> )         | ≥20000              |                         | 1·37 (0·49-3·85)        |
|                                                                         | None                |                         | 1·00 (reference)        |
|                                                                         | 1-<100              |                         | 2·88 (1·18-7·05)        |
|                                                                         | 100-<250            |                         | 1·33 (0·68-2·61)        |
|                                                                         | 250-<400            |                         | 2·15 (1·14-4·08)        |
| Platinum (mg/m <sup>2</sup> )                                           | ≥400                |                         | 2·41 (1·15-5·05)        |
|                                                                         | None                |                         | 1·00 (reference)        |
|                                                                         | 1-<400              |                         | 0·36 (0·05-2·74)        |
| Bleomycin                                                               | ≥400                |                         | 2·83 (1·05-7·59)        |
|                                                                         | No                  |                         | 1·00 (reference)        |
| Methotrexate                                                            | Yes                 |                         | 0·36 (0·09-1·54)        |
|                                                                         | No                  |                         | 1·00 (reference)        |
| Splenectomy                                                             | Yes                 |                         | 0·68 (0·43-1·07)        |
|                                                                         | No                  |                         | 1·00 (reference)        |
|                                                                         | Yes                 |                         | 2·17 (0·80-5·89)        |

### Ewing sarcoma

| <b>Diagnosis decade</b>                                         | <b>Per 10 years</b> | <b>0·69 (0·52-0·91)</b> | <b>0·82 (0·56-1·21)</b> |
|-----------------------------------------------------------------|---------------------|-------------------------|-------------------------|
| Any RT max dose (Gy)                                            | None                |                         | 1·00 (reference)        |
|                                                                 | >0-<40              |                         | 4·24 (1·56-11·5)        |
|                                                                 | 40-<50              |                         | 3·10 (1·18-8·16)        |
|                                                                 | ≥50                 |                         | 3·12 (1·35-7·25)        |
| Anthracycline, doxorubicin equivalent dose (mg/m <sup>2</sup> ) | None                |                         | 1·00 (reference)        |
|                                                                 | 1-<100              |                         | 3·34 (0·36-31·3)        |
|                                                                 | 100-<250            |                         | 1·28 (0·32-5·03)        |
|                                                                 | 250-<400            |                         | 1·88 (0·67-5·23)        |
|                                                                 | ≥400                |                         | 2·37 (0·86-6·55)        |
| Amputation surgery                                              | None                |                         | 1·00 (reference)        |
|                                                                 | Limb-sparing        |                         | 1·79 (0·52-6·09)        |
|                                                                 | Amputation          |                         | 1·17 (0·65-2·09)        |

RT: radiation therapy; Gy: Gray;

Note: All models include sex and attained age (cubic splines)

**Appendix Table 13. Prevalence ratios for association between diagnosis decade and grade 3-5 chronic health conditions in the first 5 years post-diagnosis among 5-year survivors of childhood cancer and the impact of adding specific treatment exposures to multivariable regression models.**

|                                                                         |                     | Model without treatment variables | Model with treatment variables |
|-------------------------------------------------------------------------|---------------------|-----------------------------------|--------------------------------|
|                                                                         |                     | PR (95% CI)                       | PR (95% CI)                    |
| <b>Hodgkin lymphoma</b>                                                 |                     |                                   |                                |
| <b>Diagnosis decade</b>                                                 | <b>Per 10 years</b> | <b>0·87 (0·76-1·00)</b>           | <b>1·11 (0·88-1·40)</b>        |
| Any RT max dose (Gy)                                                    | None                |                                   | 1·00 (reference)               |
|                                                                         | >0-<20              |                                   | 1·29 (0·49-3·37)               |
|                                                                         | 20-<30              |                                   | 1·18 (0·72-1·95)               |
|                                                                         | 30-<40              |                                   | 1·75 (1·00-3·07)               |
|                                                                         | 40-<50              |                                   | 2·83 (1·57-5·10)               |
|                                                                         | ≥50                 |                                   | 3·72 (1·67-8·32)               |
| Alkylating agent, cyclophosphamide equivalent dose (mg/m <sup>2</sup> ) | None                |                                   | 1·00 (reference)               |
|                                                                         | 1-<4000             |                                   | 2·24 (1·34-3·74)               |
|                                                                         | 4000-<8000          |                                   | 1·12 (0·72-1·76)               |
|                                                                         | 8000-<12000         |                                   | 1·12 (0·74-1·70)               |
|                                                                         | 12000-<16000        |                                   | 1·19 (0·79-1·79)               |
|                                                                         | 16000-<20000        |                                   | 1·67 (0·91-3·09)               |
| Anthracycline, doxorubicin equivalent dose (mg/m <sup>2</sup> )         | None                |                                   | 1·00 (reference)               |
|                                                                         | 1-<150              |                                   | 0·52 (0·26-1·02)               |
|                                                                         | 150-<300            |                                   | 0·58 (0·33-1·00)               |
|                                                                         | ≥300                |                                   | 0·55 (0·26-1·18)               |
| Platinum (mg/m <sup>2</sup> )                                           | None                |                                   | 1·00 (reference)               |
|                                                                         | 1-<400              |                                   | 0·41 (0·05-3·32)               |
|                                                                         | ≥400                |                                   | 0·99 (0·33-3·00)               |
| Bleomycin                                                               | No                  |                                   | 1·00 (reference)               |
|                                                                         | Yes                 |                                   | 2·28 (1·44-3·60)               |
| Splenectomy                                                             | No                  |                                   | 1·00 (reference)               |
|                                                                         | Yes                 |                                   | 1·31 (0·95-1·79)               |
| <b>Wilms tumor</b>                                                      |                     |                                   |                                |
| <b>Diagnosis decade</b>                                                 | <b>Per 10 years</b> | <b>1·18 (1·00-1·40)</b>           | <b>1·38 (1·09-1·74)</b>        |
| Abdomen/pelvis RT max dose (Gy)                                         | None                |                                   | 1·00 (reference)               |
|                                                                         | >0-<20              |                                   | 1·61 (1·06-2·46)               |
|                                                                         | 20-<30              |                                   | 3·14 (1·92-5·12)               |
|                                                                         | 30-<40              |                                   | 3·02 (1·56-5·84)               |
|                                                                         | ≥40                 |                                   | 14·8 (6·83-31·9)               |
| Anthracycline, doxorubicin equivalent dose (mg/m <sup>2</sup> )         | None                |                                   | 1·00 (reference)               |
|                                                                         | 1-<150              |                                   | 1·52 (0·91-2·55)               |
|                                                                         | 150-<300            |                                   | 1·32 (0·87-1·99)               |
|                                                                         | ≥300                |                                   | 1·84 (1·08-3·12)               |
| Platinum                                                                | No                  |                                   | 1·00 (reference)               |
|                                                                         | Yes                 |                                   | 1·99 (1·17-3·37)               |
| Vincristine                                                             | No                  |                                   | 1·00 (reference)               |
|                                                                         | Yes                 |                                   | 0·85 (0·51-1·43)               |
| Splenectomy                                                             | No                  |                                   | 1·00 (reference)               |
|                                                                         | Yes                 |                                   | -                              |
| <b>Non-Hodgkin lymphoma</b>                                             |                     |                                   |                                |
| <b>Diagnosis decade</b>                                                 | <b>Per 10 years</b> | <b>0·85 (0·75-0·97)</b>           | <b>0·75 (0·60-0·94)</b>        |
| Any RT max dose (Gy)                                                    | None                |                                   | 1·00 (reference)               |
|                                                                         | >0-<20              |                                   | 0·90 (0·58-1·39)               |
|                                                                         | 20-<30              |                                   | 0·91 (0·65-1·29)               |
|                                                                         | 30-<40              |                                   | 1·42 (0·89-2·28)               |
|                                                                         | 40-<50              |                                   | 2·64 (1·42-4·92)               |
|                                                                         | ≥50                 |                                   | 4·75 (2·02-11·2)               |
| Alkylating agent, cyclophosphamide equivalent dose (mg/m <sup>2</sup> ) | None                |                                   | 1·00 (reference)               |
|                                                                         | 1-<4000             |                                   | 1·42 (0·88-2·29)               |
|                                                                         | 4000-<8000          |                                   | 1·04 (0·63-1·72)               |
|                                                                         | 8000-<12000         |                                   | 0·97 (0·58-1·62)               |
|                                                                         | 12000-<16000        |                                   | 0·85 (0·48-1·51)               |
|                                                                         | 16000-<20000        |                                   | 0·89 (0·47-1·68)               |
|                                                                         | ≥20000              |                                   | 0·67 (0·29-1·54)               |
|                                                                         | None                |                                   | 1·00 (reference)               |

|                                                                 |          |                  |
|-----------------------------------------------------------------|----------|------------------|
| Anthracycline, doxorubicin equivalent dose (mg/m <sup>2</sup> ) | 1-<100   | 1·16 (0·69-1·94) |
|                                                                 | 100-<250 | 1·08 (0·77-1·52) |
|                                                                 | 250-<400 | 1·15 (0·80-1·65) |
|                                                                 | ≥400     | 0·65 (0·34-1·24) |
| Platinum (mg/m <sup>2</sup> )                                   | None     | 1·00 (reference) |
|                                                                 | 1-<400   | 1·44 (0·72-2·88) |
|                                                                 | ≥400     | 0·90 (0·37-2·17) |
| Bleomycin                                                       | No       | 1·00 (reference) |
|                                                                 | Yes      | 1·78 (0·95-3·33) |
| Methotrexate                                                    | No       | 1·00 (reference) |
|                                                                 | Yes      | 1·52 (1·15-2·01) |
| Splenectomy                                                     | No       | 1·00 (reference) |
|                                                                 | Yes      | 1·27 (0·41-4·00) |

### **Neuroblastoma**

| <b>Diagnosis decade</b>                                                 | <b>Per 10 years</b> | <b>1·30 (1·16-1·44)</b> | <b>0·93 (0·79-1·09)</b> |
|-------------------------------------------------------------------------|---------------------|-------------------------|-------------------------|
| Any RT max dose (Gy)                                                    | None                |                         | 1·00 (reference)        |
|                                                                         | >0-<20              |                         | 0·86 (0·67-1·11)        |
|                                                                         | 20-<30              |                         | 1·71 (1·30-2·24)        |
|                                                                         | 30-<40              |                         | 2·40 (1·49-3·86)        |
|                                                                         | ≥40                 |                         | 4·13 (2·05-8·30)        |
| Alkylating agent, cyclophosphamide equivalent dose (mg/m <sup>2</sup> ) | None                |                         | 1·00 (reference)        |
|                                                                         | 1-<4000             |                         | 0·55 (0·37-0·81)        |
|                                                                         | 4000-<8000          |                         | 0·74 (0·52-1·05)        |
|                                                                         | 8000-<12000         |                         | 0·74 (0·47-1·14)        |
|                                                                         | 12000-<16000        |                         | 1·04 (0·68-1·57)        |
|                                                                         | 16000-<20000        |                         | 0·96 (0·57-1·61)        |
| Anthracycline, doxorubicin equivalent dose (mg/m <sup>2</sup> )         | None                |                         | 1·00 (reference)        |
|                                                                         | 1-<150              |                         | 1·50 (1·07-2·11)        |
|                                                                         | 150-<300            |                         | 1·58 (1·15-2·16)        |
|                                                                         | ≥300                |                         | 1·72 (1·13-2·63)        |
| Platinum (mg/m <sup>2</sup> )                                           | None                |                         | 1·00 (reference)        |
|                                                                         | 1-<400              |                         | 1·35 (0·73-2·50)        |
|                                                                         | ≥400                |                         | 1·50 (0·90-2·51)        |
| Epipodophyllotoxin (mg/m <sup>2</sup> )                                 | None                |                         | 1·00 (reference)        |
|                                                                         | 1-<1000             |                         | 1·38 (0·75-2·54)        |
|                                                                         | 1000-<4000          |                         | 1·53 (0·92-2·55)        |
|                                                                         | ≥4000               |                         | 2·59 (1·38-4·86)        |

### **Soft tissue sarcoma**

| <b>Diagnosis decade</b>                                                 | <b>Per 10 years</b> | <b>0·89 (0·79-1·00)</b> | <b>0·95 (0·84-1·08)</b> |
|-------------------------------------------------------------------------|---------------------|-------------------------|-------------------------|
| Any RT max dose (Gy)                                                    | None                |                         | 1·00 (reference)        |
|                                                                         | >0-<40              |                         | 1·95 (1·15-3·31)        |
|                                                                         | 40-<50              |                         | 2·56 (1·69-3·87)        |
|                                                                         | ≥50                 |                         | 3·83 (2·55-5·77)        |
| Anthracycline, doxorubicin equivalent dose (mg/m <sup>2</sup> )         | None                |                         | 1·00 (reference)        |
|                                                                         | 1-<300              |                         | 1·31 (1·01-1·70)        |
|                                                                         | 300-<450            |                         | 1·28 (0·98-1·66)        |
|                                                                         | ≥450                |                         | 1·17 (0·76-1·82)        |
| Alkylating agent, cyclophosphamide equivalent dose (mg/m <sup>2</sup> ) | None                |                         | 1·00 (reference)        |
|                                                                         | 1-<8000             |                         | 0·93 (0·62-1·40)        |
|                                                                         | 8000-<12000         |                         | 0·79 (0·55-1·15)        |
|                                                                         | 12000-<16000        |                         | 0·78 (0·53-1·15)        |
|                                                                         | 16000-<20000        |                         | 0·78 (0·54-1·14)        |
| ≥20000                                                                  |                     | 0·73 (0·51-1·03)        |                         |

RT: radiation therapy; Gy: Gray;

Note: All models include sex and attained age (cubic spline)
